# **Characterizing pupil dynamics coupling to brain state fluctuation based on lateral hypothalamic activity**

## **Authors**

Kengo Takahashi<sup>1,2</sup>, Filip Sobczak<sup>1,2</sup>, Patricia Pais-Roldán<sup>3</sup>, and Xin Yu<sup>4\*</sup>

<sup>1</sup>High-Field Magnetic Resonance Department, Max Planck Institute for Biological Cybernetics, 72076 Tübingen, Germany.

<sup>2</sup>Graduate Training Centre of Neuroscience, International Max Planck Research School (IMPRS), University of Tübingen, 72076 Tübingen, Germany.

<sup>3</sup>Medical Imaging Physics, Institute of Neuroscience and Medicine (INM-4), Forschungszentrum Jülich, 52425 Jülich, Germany.

<sup>4</sup>Athinoula A. Martinos Center for Biomedical Imaging, Massachusetts General Hospital, Harvard Medical School, Charlestown, MA 02129, USA.

\*. Corresponding author:

Email: [xyu9@mgh.harvard.edu](mailto:xyu9@mgh.harvard.edu)

Address: 149 13th. Street, Charlestown, MA, 02129, USA

## Abstract

Pupil dynamics presents varied correlation features with brain activity under different vigilant levels. The modulation of brain state changes can arise from the lateral hypothalamus (LH), where diverse neuronal cell types contribute to arousal regulation in opposite directions via the anterior cingulate cortex (ACC). However, the relationship of the LH and pupil dynamics has seldom been investigated. Here, we performed local field potential (LFP) recordings at the LH and ACC, and the whole brain fMRI with simultaneous fiber photometry  $\text{Ca}^{2+}$  recording in the ACC, to evaluate their correlation with brain state-dependent pupil dynamics. Both LFP and functional MRI (fMRI) data showed opposite correlation features to pupil dynamics, demonstrating an LH activity-dependent manner. Our results demonstrate that the correlation of pupil dynamics with ACC LFP and whole-brain fMRI signals depends on LH activity, indicating a role of the latter in brain state regulation.

## Introduction

Brain state fluctuation, as a fundamental feature of animal brain physiology, is related to arousal regulation during wakefulness, sleep, or under anesthesia<sup>1-3</sup>. It can be assessed using eye-tracking (e.g. pupillometry) as an external index in combination with direct brain functional measurements such as electrophysiological recordings or functional MRI (fMRI)<sup>3-6</sup>. For instance, the slow cortical oscillations of the electrophysiological signals are negatively synchronized with pupil size fluctuations during low arousal states in unconscious animals<sup>5</sup>. Besides measuring cortical brain state changes, studies in subcortical areas have revealed the involvement of the lateral hypothalamus (LH) and multiple brainstem nuclei including the locus coeruleus (LC) and periaqueductal grey in the regulation of brain states<sup>2,7-10</sup>. In particular, LC-based noradrenergic regulation of the anterior cingulate cortex (ACC) activity is in tight relationship with the pupil size regulation<sup>7,8,11,12</sup>, presenting a crucial link between the ACC activity and different sleep states and wakefulness<sup>13,14</sup>. It should be noted that the spontaneous change of pupil size and associated brain states are not solely dependent on the noradrenergic pathways; instead, they are likely orchestrated by multiple subcortical structures<sup>12,15,16</sup>. Interestingly, neural spike rates recorded in the ACC present both positive and negative correlations with pupil size change across trials<sup>16</sup>, suggesting more complex subcortical regulation of brain state-dependent pupil dynamics.

The LH is an important hub for brain state regulation<sup>2</sup> where different neural cell types co-exist, showing varied activities depending on the underlying arousal state<sup>17-20</sup>. Also, electrical activation of the LH directly causes pupil dilation<sup>21</sup>. The LH activity has been reported to modulate LC-mediated arousal state and pupil dynamics<sup>22-24</sup>. There is anatomical evidence showing direct neural projections of arousal-related nuclei from the LH to the ACC<sup>25</sup>. However, the functional interaction between the LH and ACC has not been fully investigated to elucidate their impact on brain state fluctuation and pupil dynamics.

Here, we measured brain state dynamics with pupillometry, electrophysiology in the LH and ACC, and whole-brain fMRI with simultaneous fiber photometry  $\text{Ca}^{2+}$  recording in the ACC. We first identified a biphasic distribution of the correlation between the local field potential (LFP) and pupil dynamics in both LH and ACC across different trials of recordings. Based on opposite signs of the correlation (positive vs. negative), we discovered two distinct brain states and performed cross-

frequency coupling analyses to identify brain state-specific characteristics of LFP signals for the two states. Specifically, the LFP delta (1-4Hz) phase coupled stronger to amplitudes of higher frequency bands at the ACC in trials where LH-LFP and pupil were negatively correlated, suggesting the trials with negative signs as a lower arousal state<sup>26-28</sup>. Meanwhile, similar to the LFP-based pupil dynamic correlation, the ACC neuronal  $\text{Ca}^{2+}$  also showed an opposite correlation with pupil dynamics across different trials. Interestingly, in trials with the positive correlation between LH fMRI and pupil dynamics, the ACC  $\text{Ca}^{2+}$  signal showed a primarily negative correlation with pupil dynamics. This observation suggested that similar brain states could be identified in electrophysiology and fMRI measurements based on LH activity. This work revealed unique LH activity patterns with both LFP and fMRI according to its different coupling features with pupil dynamics, which were associated with different brain states.

## Results

### *Simultaneous pupillometry and electrophysiology recordings in ACC and LH*

LFP was recorded at ACC and LH simultaneously with pupillometry for 15 minutes to study the brain state-dependent pupil dynamics in anesthetized rats (**Fig.1a**). The LFP power spectrum fluctuation was well-aligned with concurrent pupil diameter changes in a representative trial (**Fig. 1b**). Among different trials, varied correlation features, i.e., positive, negative, or no coupling between pupil dynamics and the power of various LFP frequency bands in the LH and ACC were detected, as shown in **Fig 1c and d** (89 trials from 9 animals). The varied correlation patterns were also detected within the same animal (**Supplementary Fig.1**). In particular, among all frequencies, the oscillation of the delta (1-4 Hz) power was most prominent throughout the entire recording period (**Fig. 1b**). Therefore, correlations of delta power with pupil dynamics were further explored to investigate the LFP coupling between LH and ACC.

The correlation between pupil dynamics and LFP delta power fluctuation was more evenly distributed in the LH (positive correlation: 52%,  $n=46$ ; no correlation: 4%,  $n=4$ ; negative correlation: 44%,  $n=39$ ; **Fig. 1e left**) than the ACC, which showed primarily negative correlation to pupil dynamics (positive correlation: 13%,  $n=12$ ; no correlation: 8%,  $n=7$ ; negative correlation: 79%,  $n=70$ , **Fig. 1e right**). The correlation-based distribution patterns between the LH and ACC differed significantly, as assessed using the two-sample Kolmogorov-Smirnov test<sup>29</sup> ( $p = 5.1 \times 10^{-7}$ ; **Fig. 1f**). Based on the

positive vs. negative correlation features, we specified two groups, which were statistically determined by calculating the 95% confidence interval from 10,000 correlation measures computed between randomized pupil size and LFP delta power signals (**Supplementary Fig.2**). When the LH delta power and pupil dynamics were negatively correlated (LFP-Group 1), ACC delta power fluctuation and pupil dynamics were negatively correlated in 100% of cases (**Fig.1g**). However, when LH delta power fluctuation and pupil dynamics were positively correlated, possibly indicating a different brain state (LFP-Group 2), the correlation patterns between ACC delta power and pupil dynamics exhibited both positive and negative correlation (**Fig. 1g**). Two-sample t-tests showed that correlations of ACC delta power and pupil dynamics between LFP-Group 1 and 2 occurred differently. ( $p = 5.2 \times 10^{-10}$ ; **Fig. 1g**), indicating distinct brain states based on the relationship between LH and pupil dynamics.

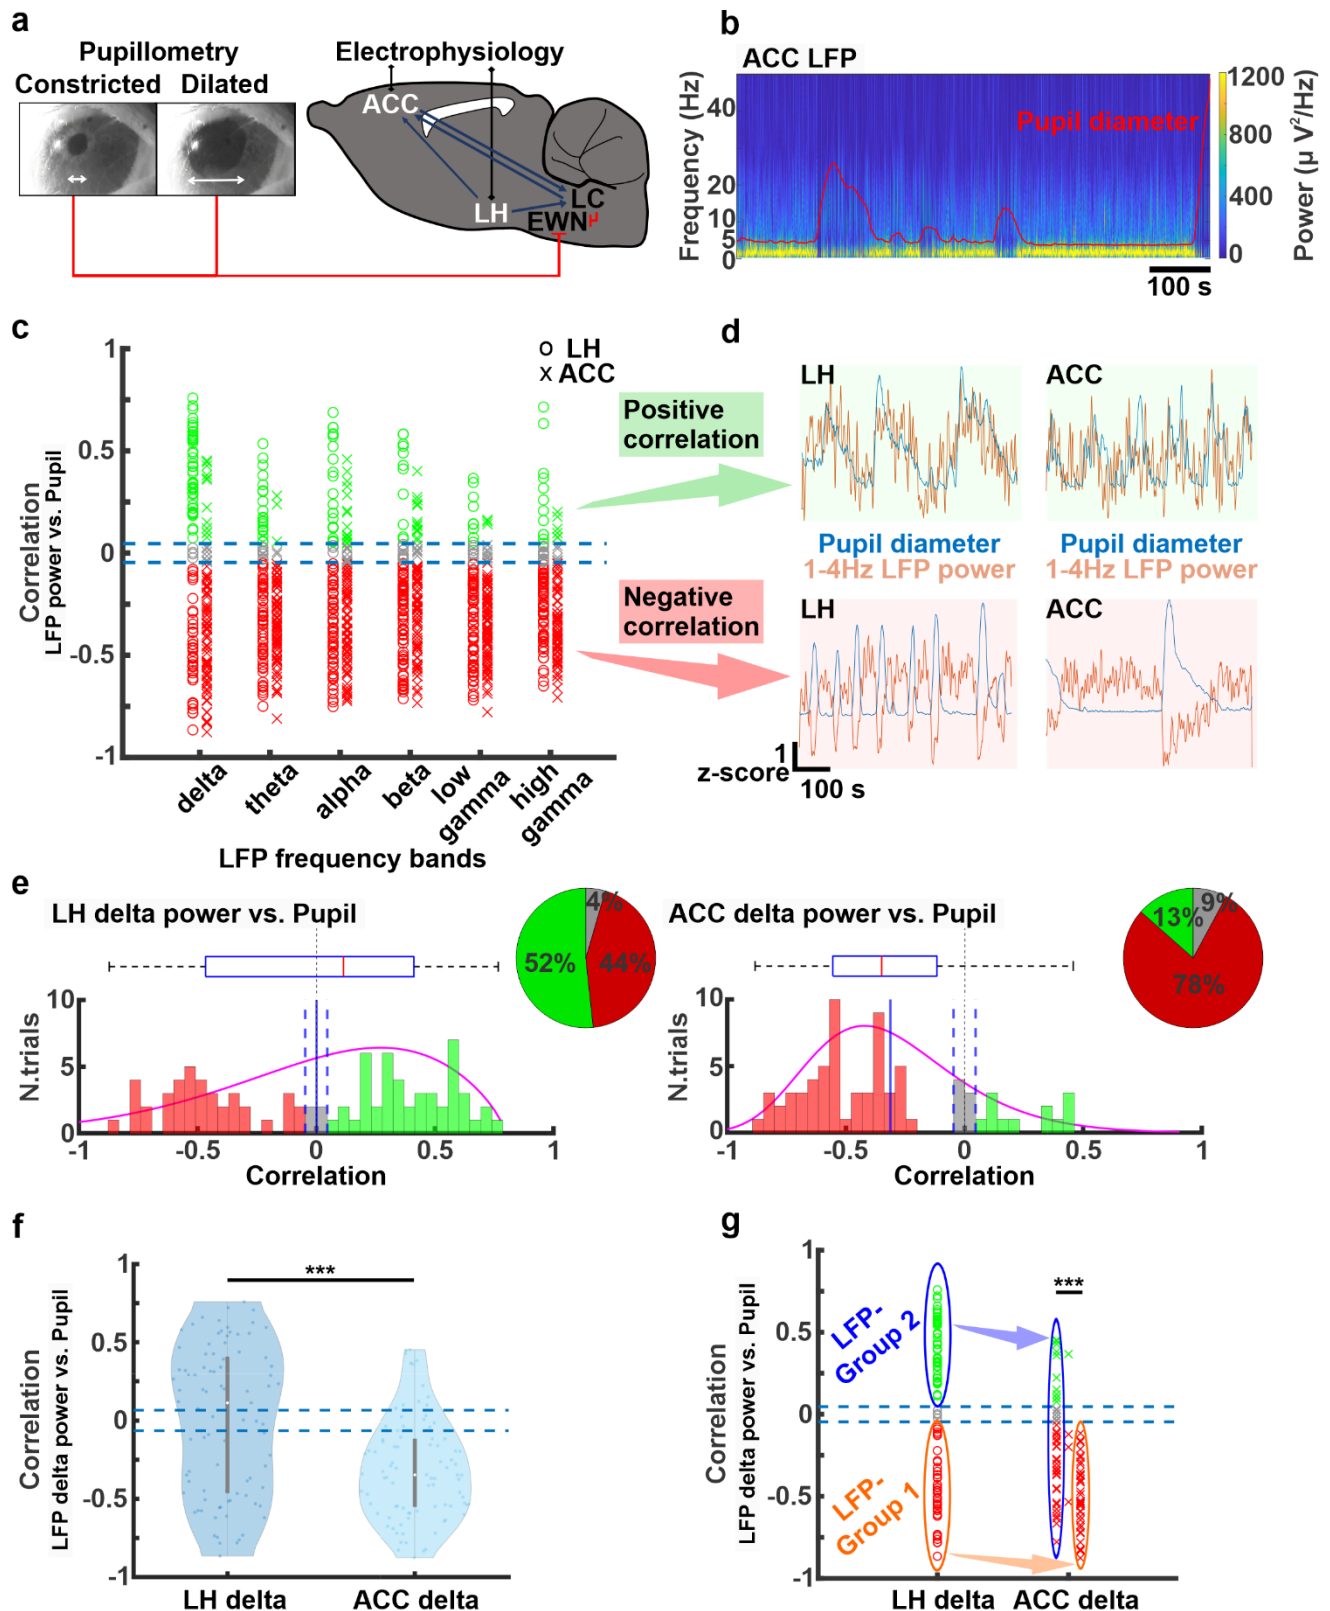

**Figure 1. a)** The experimental setup for simultaneous electrophysiology and pupil size recordings. Images of pupillary response (constricted and dilated pupil) are shown. **b)** Power spectrum of LFP signals in the ACC with pupil diameter fluctuations (red trace) in a representative rat during 15 min of resting state recording. **c)** Correlation coefficients between pupil dynamics and power of all LFP bands in the ACC (circular markers) and in the LH (cross markers) from all trials (n=89, 9 animals). Each

marker represents the positive (green), no (gray), or negative (red) correlation on each trial. Thresholds of positive (0.046) or negative (-0.046) correlations are shown as blue dashed lines. **d)** Examples of positive (green shade) and negative (red shade) correlation between pupil dynamics (blue trace) and LFP delta (1-4Hz) band power fluctuations (red trace) in the LH and ACC during 15 min of resting state. **e)** Distribution of correlation coefficients between LFP delta power fluctuation and pupil dynamics in the LH (left; [+ (green)]: n=46, 52%, [0 (grey)]: n=4, 4%, [- (red)]: n=39, 44%) and ACC (right; [+ (green)]: n=12, 13%, [0 (gray)]: n= 7, 8%, [- (red)]: n= 70, 79%). Each pie chart represents ratios of the positive, no, and negative correlations. Vertical blue solid lines represent the mean of correlation coefficients across all trials in the LH and ACC respectively. Pink curves and boxplots represent the distribution of trials for LH and ACC respectively. The vertical black dashed line represents zero. **f)** Violin plots for the distribution of correlation coefficients between pupil dynamics and LFP delta power fluctuation in LH and ACC. **g)** Categorization of correlation coefficients in the ACC between LFP delta power fluctuation and pupil dynamics when LH delta power fluctuation has a positive (LFP-Group 1, orange) or negative (LFP-Group 2, blue) correlation with pupil dynamics. In LFP-Group 1, ACC delta power fluctuation and pupil size fluctuation show a negative correlation (correlation coefficient < -0.046) in all trials. In LFP-Group 2, correlations of ACC delta power fluctuation and pupil dynamics diversify to a great extent. *Note:* [+]: correlation coefficient > 0.046, [0]: -0.046 < correlation coefficient < 0.046, [-]: correlation coefficient < -0.046; \*\*\* p< 0.001, \*\* p< 0.01, \* p< 0.05.

### ***Characterizing distinct brain states through cross-frequency coupling analyses***

To further investigate two brain states identified by distinct coupling features between the LH delta power fluctuation and pupil dynamics (**Fig. 2a**), we performed cross-frequency coupling analyses. In LFP-Group 1, the LH and ACC exhibited the peak power at 2-2.5Hz (**Fig. 2b**, **Supplementary Fig. 3**). In contrast, in LFP-Group 2 (when the LH delta power fluctuation was positively correlated with pupil dynamics), the LH and ACC exhibited the peak power at 3Hz (**Fig. 2b**, **Supplementary Fig. 3**). Similarly, analyses of both coherence and phase-locking values between the LH and ACC showed the highest values at 2Hz in LFP-Group 1 but at 3Hz in LFP-Group 2 (**Fig. 2c**, **d**, **Supplementary Fig.4**, **Table.1**). Two-sample t-tests between LFP-Group 1 and 2 phase-locking values showed significant difference at 2Hz ( $p = 4.8 \times 10^{-7}$ ) and 3Hz ( $p = 8.8 \times 10^{-7}$ ). These results

indicate that the neuronal coupling between LH and ACC altered between two different states. Moreover, the modulation index, a measurement of the phase-amplitude coupling, between the phase of delta band and amplitudes of all other LFP frequency bands at the ACC was higher in LFP-Group 1 than LFP-Group 2 (**Table. 2**). Two-sample t-tests between LFP-Group 1 and 2 showed significant difference on theta band ( $p = 1.9 \times 10^{-12}$ ), alpha band ( $p = 4.6 \times 10^{-12}$ ), beta band ( $p = 1.9 \times 10^{-11}$ ), low gamma band ( $p = 1.5 \times 10^{-5}$ ), and high gamma band ( $p = 5.9 \times 10^{-8}$ ). These results validate the presence of two distinct brain states involving both LH and ACC under anesthesia, which resembled previous sleep studies<sup>28,30,31</sup> (see Discussion).

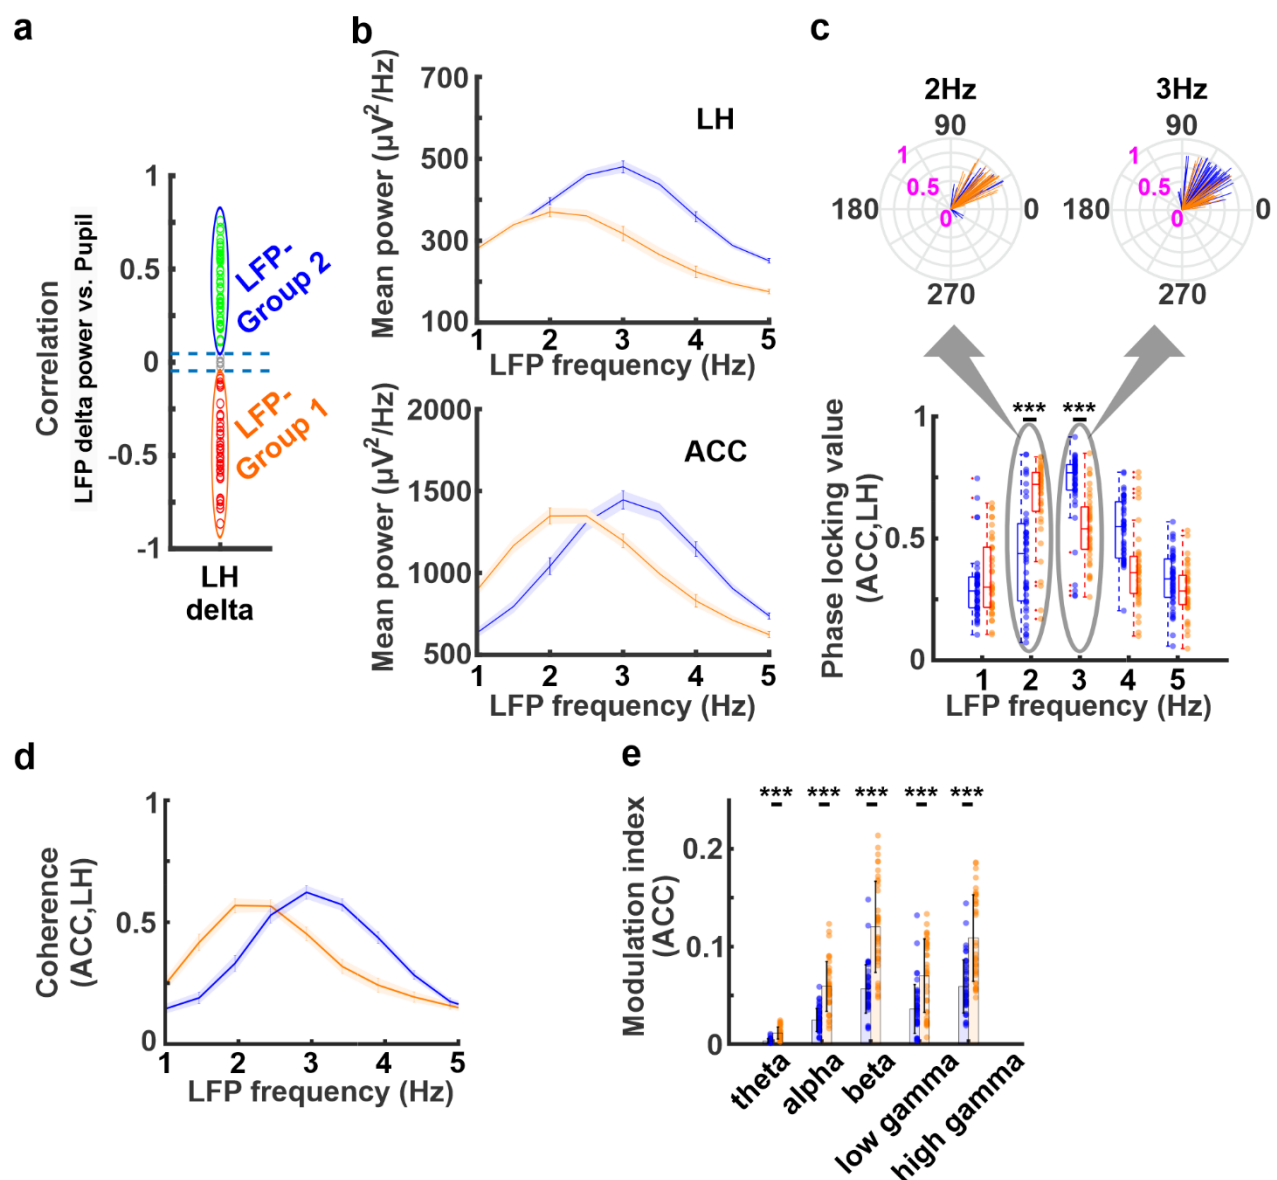

**Figure 2.** **a)** Correlation coefficients between LFP delta power and pupil dynamics in the LH (green; LFP-Group 2, [+]:  $n=47, 52.8\%$ , grey; [0]:  $n=3, 3.4\%$ , red; LFP-Group 1 [-]:  $n=39, 43.8\%$ ). **b)** Power spectrum density of the LH (top) and ACC (bottom) in LFP-Group 2 (blue line) and LFP-Group 1



(orange line). The shaded areas represent the standard error of the mean. The peak frequency in both LH and ACC is at 3Hz in LFP-Group 2 (blue line) but at 2Hz in LFP-Group 1 (orange line). **c)** Phase locking value between the LH and ACC in both groups. The highest phase synchrony occurred at 3Hz in LFP-Group 2 (blue) but at 2Hz in LFP-Group 1 (orange). The top radial plots represent the trial-specific phase angles ([degrees], black) and phase-locking values (pink) between LH and ACC at 2Hz and 3Hz. **d)** Magnitude squared coherence between LH and ACC. The highest coherence occurred at 3Hz in LFP-Group 2 (blue) but at 2Hz in LFP-Group 1 (orange). The shaded areas represent the standard error of the mean. **e)** Phase-amplitude coupling using modulation index (MI) at the ACC between the phase of delta (1-4Hz) band and amplitude of other frequency bands. MI is higher in LFP-Group 1 (orange) than LFP-Group 2 (blue) on all frequency bands. Error bars indicate the standard deviation. *Note:* \*\*\*  $p < 0.001$ , \*\*  $p < 0.01$ , \*  $p < 0.05$

### ***Verifying coupling features of neuronal $\text{Ca}^{2+}$ signals with simultaneous pupil dynamics and fMRI***

To assess the relationship between brain state-dependent pupil dynamics and whole-brain activity, blood oxygen level dependent (BOLD) fMRI with simultaneous pupillometry was performed as previously reported (61 trials from 10 animals)<sup>4</sup>. Meanwhile, we performed fiber photometry to record the GCaMP6-mediated neuronal  $\text{Ca}^{2+}$  signals in the ACC of these animals, as an alternative to LFP recordings, with better MRI compatibility (**Fig. 3a**)<sup>4</sup>. Similar to LFP results, the power of ACC  $\text{Ca}^{2+}$  signals also co-varied with spontaneous pupil size fluctuations (**Fig. 3b**). The power of 1-4 Hz  $\text{Ca}^{2+}$  signal in the ACC was primarily negatively correlated with pupil dynamics (positive correlation: 11%,  $n=7$ ; no correlation: 20%,  $n=12$ ; negative correlation: 69%,  $n=42$ ; **Fig. 3c, d**), which was consistent with our electrophysiology results (**Fig. 1e**). The clustering of varied correlation features between the 1-4 Hz  $\text{Ca}^{2+}$  power fluctuation and pupil dynamics among different trials was determined based on the 95% confidence interval calculated by permutation (**Supplementary Fig. 5**). Besides pupil dynamics, ACC neuronal  $\text{Ca}^{2+}$  signal also showed positive and negative correlation with fMRI signals across different brain regions and trials (**Fig. 3e, Supplementary Fig. 6a**). Interestingly, in trials with a negative correlation between 1-4 Hz  $\text{Ca}^{2+}$  power fluctuation and pupil dynamics, the  $\text{Ca}^{2+}$  power fluctuation showed a positive correlation with fMRI fluctuation in cortical and thalamic areas but a negative correlation in subcortical areas, including the LH (**Fig. 3e, f**). In other trials, no significant

correlation was detected between fMRI and the ACC  $\text{Ca}^{2+}$  power fluctuation (**Supplementary Fig. 6b**). These multimodal fMRI results indicated that correlation features between  $\text{Ca}^{2+}$ -based neuronal fluctuation of the ACC and BOLD fMRI signals vary among different brain regions according to different anesthetized brain states.

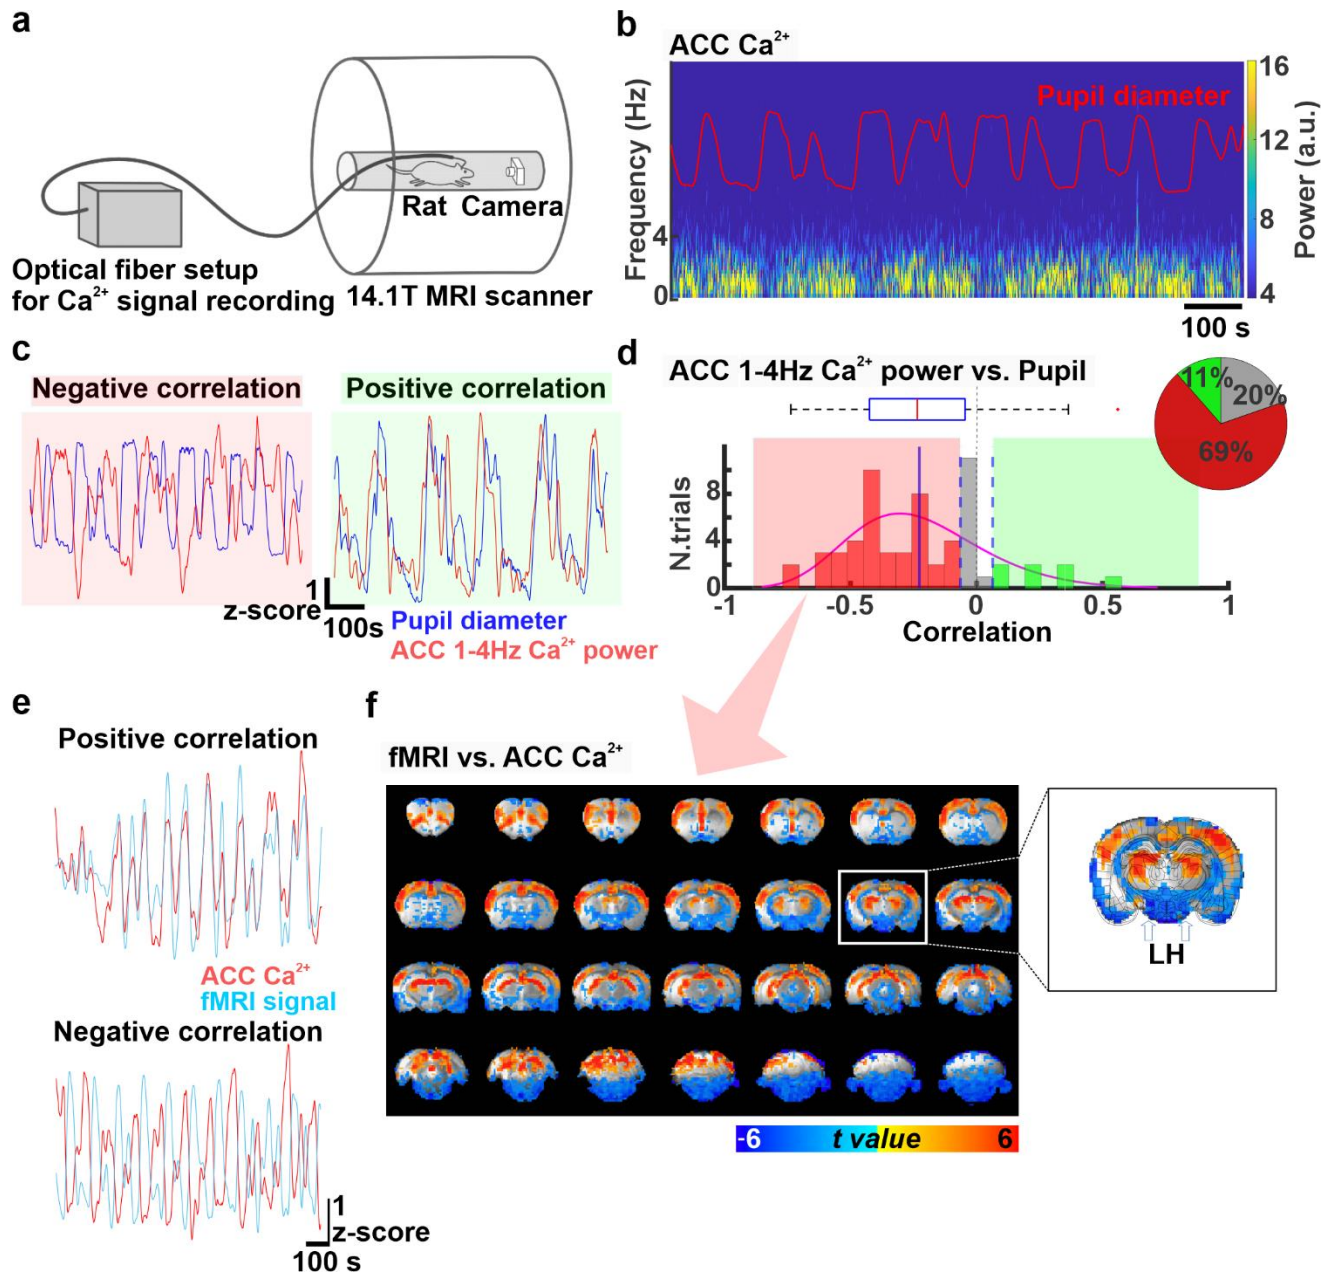

**Figure 3.** **a)** The experimental setup for multimodal resting-state BOLD fMRI recordings simultaneously with measurements of optical fiber  $\text{Ca}^{2+}$  signals and pupil dynamics. **b)** Power spectrum of ACC  $\text{Ca}^{2+}$  signals during 15 min of resting-state along with changes in pupil diameter (red trace) in a representative rat. a.u.: arbitrary units. **c)** Examples of positive (right, green) and negative (left, red) correlations between pupil dynamics and ACC 1-4Hz  $\text{Ca}^{2+}$  power fluctuation during 15 min of resting state. **d)** Distribution of correlation coefficients between pupil dynamics and ACC 1-4Hz  $\text{Ca}^{2+}$

power fluctuation for all trials ( $n = 61$ , 10 animals). These correlation coefficients are negative (correlation coefficient  $< -0.064$ ) in 69% ( $n=42$ , red), none ( $-0.064 < \text{correlation coefficient} < 0.064$ ) in 20% ( $n=12$ , grey), and positive (correlation coefficient  $> 0.064$ ) in 11% ( $n=7$ ) of the trials. The pie chart represents ratios of the positive, no, and negative correlations. **e)** Examples of positive and negative correlation between fMRI signal (light blue) and ACC 1-4Hz  $\text{Ca}^{2+}$  power (red) fluctuations during 15 min of resting state. **f)** t-value maps of correlation between ACC 1-4Hz  $\text{Ca}^{2+}$  power and each fMRI voxel when ACC 1-4Hz  $\text{Ca}^{2+}$  power fluctuation and pupil dynamics were negatively correlated during 15 min of resting state ( $n=42, 69\%$ ). The overlay shows voxels with t-value  $< -2.25$  and t-value  $> 2.25$ . A coronal slice at coordinates A/P = -3.2mm is shown magnified on the right, where the location of the LH is indicated with white arrows.

### ***Classifying distinct brain states based on LH BOLD fMRI and pupil dynamics***

Next, we examined if LH BOLD signal could be used to differentiate brain state-dependent pupil dynamics across different trials, as evaluated with LFP data in previous experiments. First, we created a mean correlation map between fMRI and pupil dynamics, showing a global negative correlation pattern as previously reported (**Supplementary Fig. 7**). Moreover, similar to the fMRI- $\text{Ca}^{2+}$  correlation, the trial-specific correlation patterns between pupil dynamics and fMRI showed varied signs across different brain regions (**Fig. 4a, Supplementary Fig. 7**). In particular, at the LH, the t-value of correlation coefficient varied extensively across individual trials, showing positive (33%,  $n=20$ ) or no (67%,  $n=41$ ) correlations (**Fig. 4b**). We statistically determined this positive correlation by calculating the 95% confidence interval from 10,000 repetitions of correlation measures between randomized pupil signals and each LH fMRI voxel (**Supplementary Fig. 8**). In trials showing positive signs, robust positive correlation was also observed between the pupil dynamics and fMRI signal in the brainstem and basal forebrain regions but negative correlation was detected in thalamic and cortical regions (**Fig. 4c**), which was not detected in trials showed no correlation between LH fMRI and pupil dynamics (**Fig. 4c**). Notably, when exploring the correlation of pupil dynamics and ACC 1-4Hz  $\text{Ca}^{2+}$  power from the trials with the positive LH fMRI-pupil correlation sign, all of the ACC  $\text{Ca}^{2+}$ -pupil correlation coefficients were negative (**Fig. 4d, e; fMRI-Group 1**). This observation was consistent with the electrophysiological results when differentiating LFP-Group 1 and 2 based on LH LFP-pupil relationship (**Fig. 1f**). Two-sample t-tests for correlations of ACC 1-4Hz  $\text{Ca}^{2+}$  power with pupil

dynamics between fMRI-Group 1 and 2 showed a significant difference ( $p = 3.7 \times 10^{-4}$ ; **Fig. 4d**). It should be noted that in LFP-Group 1 the negative LH LFP (delta power)-pupil correlation predicted the negative correlation of ACC LFP (delta power)-pupil correlation, while in the fMRI-Group 1 it was the positive LH-pupil correlation which predicted the negative ACC  $\text{Ca}^{2+}$ -pupil correlation. This might be due to an anti-correlation between BOLD fMRI and delta power in the LH<sup>32</sup> (see Discussion). In addition, whole-brain fMRI BOLD and ACC  $\text{Ca}^{2+}$  power coupling was higher in fMRI-Group 1 than fMRI-Group 2 (**Fig. 4f**), indicating distinct brain states associated to the different groups. Overall, these results indicate that correlation of LH fMRI-pupil dynamics can identify distinct brain states, similar to the LH-ACC observations of LFP-based brain states.



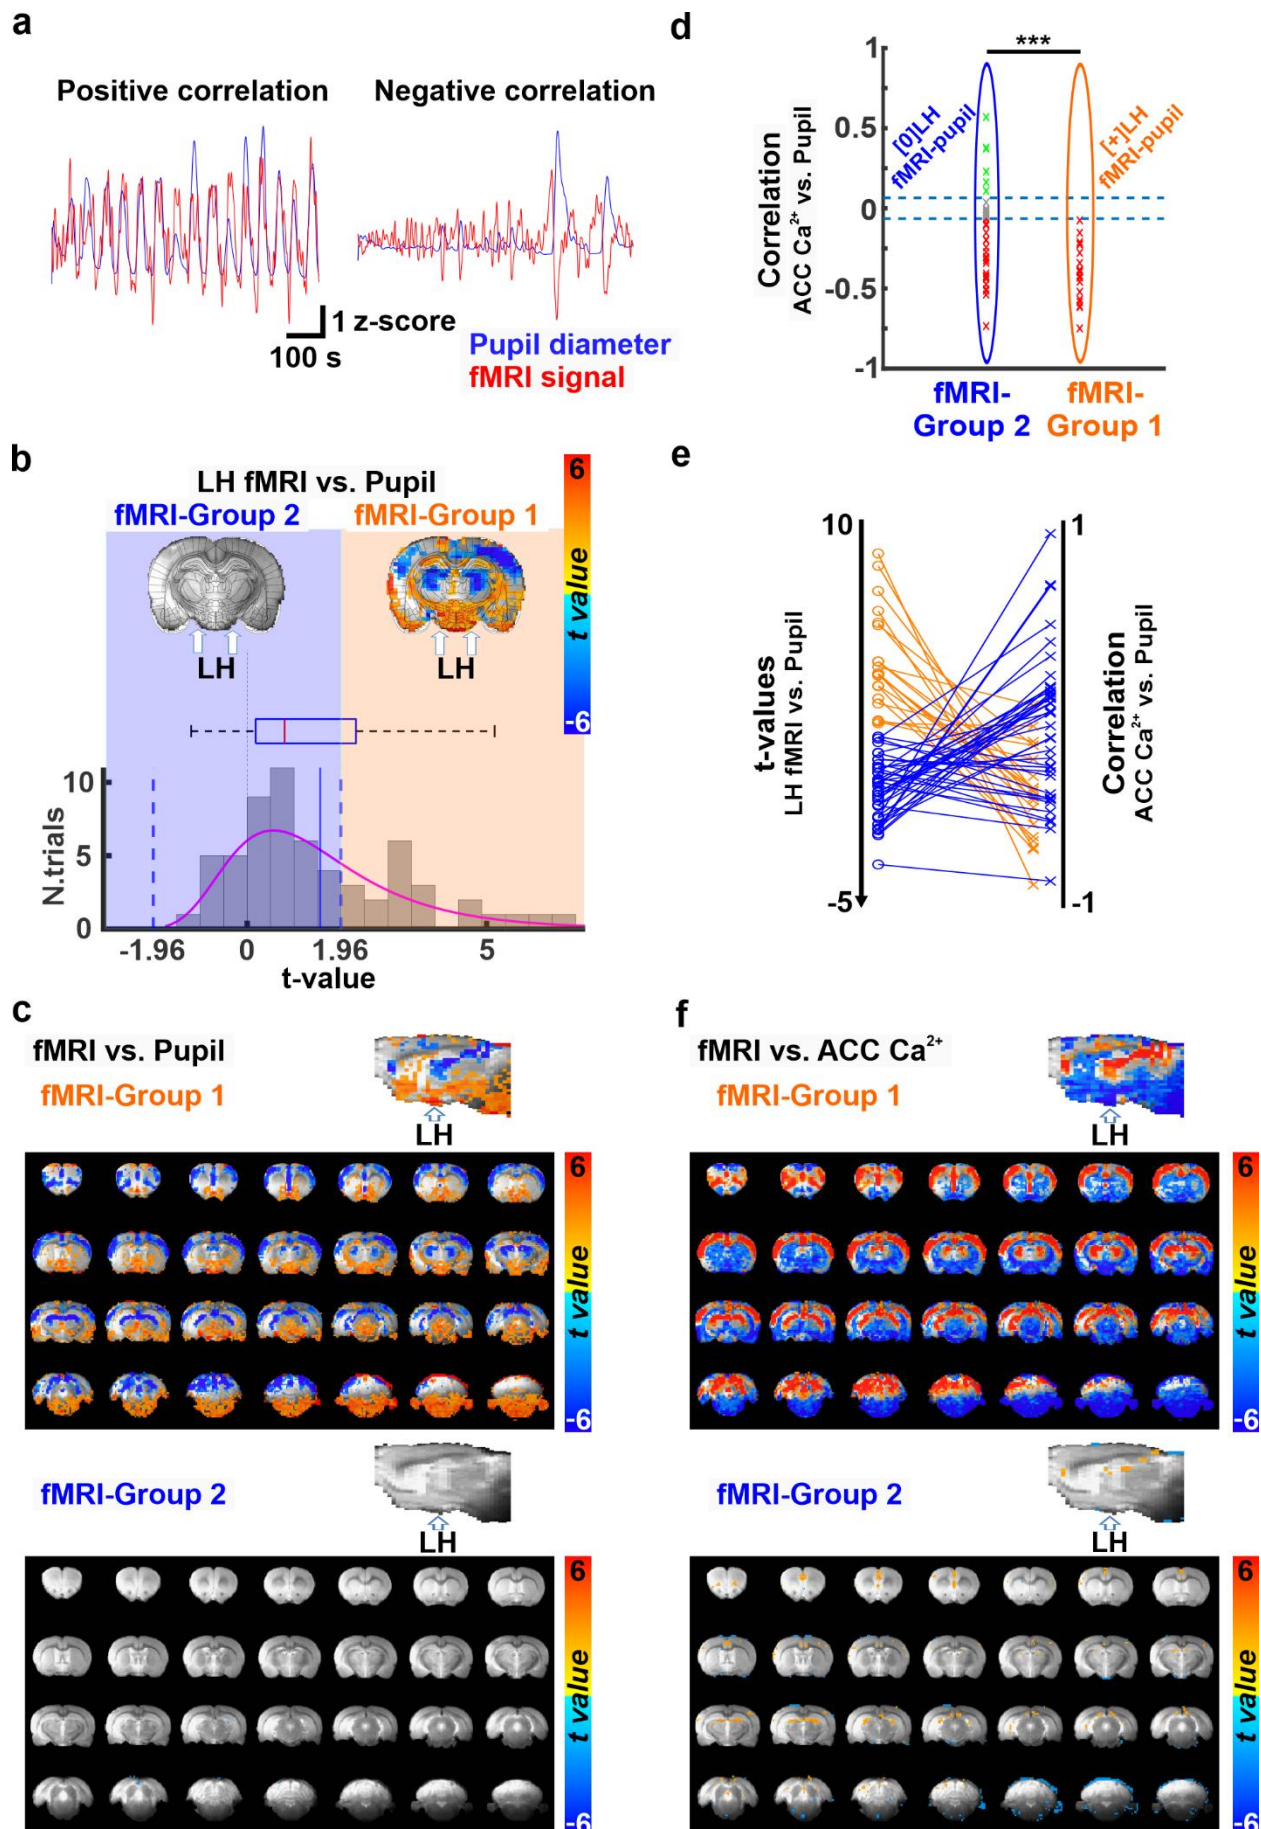

**Figure 4. a)** Examples of positive (left) and negative (right) correlations between pupil dynamics (blue) and fMRI signal fluctuations (red) during 15 min of resting state. **b)** The representation of two distinct

brain states. Trials are sorted into two groups characterized by positive (fMRI-Group 1) or no (fMRI-Group 2) correlation between the LH BOLD fMRI signal and the pupil size fluctuations. On the top, two fMRI-pupil correlation maps at A/P= -3.2mm from fMRI-Group 1 and 2 are shown. The location of LH is indicated with a white arrow. The bottom graph represents the t-value distribution of the LH-fMRI and pupil dynamics correlations across all trials (n= 61), on which the state differentiation is based. fMRI-Group 1 (positive correlation) was observed in 33% of the trials (n=20,  $t > 1.96$ ), and fMRI-Group 2 (no-correlation) in 67% of trials (n=41,  $t < 1.96$ ). **c)** Whole-brain maps and their sagittal plane view of the correlation between fMRI and pupil dynamics from trials associated with fMRI-Group 1 (top) and 2 (bottom). **d)** Correlation coefficients between pupil dynamics and ACC 1-4Hz  $\text{Ca}^{2+}$  power fluctuation sorted by fMRI-Group 1 (orange ellipse) and 2 (blue ellipse). The thresholds of correlation coefficients are set at  $\pm 0.064$ . **e)** The plot shows the correspondence between two kinds of analysis in the same data: correlation t-values between LH-fMRI and pupil (left) and the correspondent ACC 1-4Hz  $\text{Ca}^{2+}$  power and pupil dynamic correlation for each trial (right). The color indicates the groups (orange for fMRI-Group 1 and blue for fMRI-Group 2) associated with each trial. **f)** t-value whole-brain maps showing the correlation between fMRI and ACC 1-4Hz  $\text{Ca}^{2+}$  power from trials assigned to fMRI-Group 1 (top) and 2 (bottom). The overlay shows voxels with t-value  $< -2.54$  and t-value  $> 2.54$ . Note: \*\*\*  $p < 0.001$ , \*\*  $p < 0.01$ , \*  $p < 0.05$

## Discussion

In the present study, we reported distinct coupling features between brain activity and pupillometry in anesthetized rats, presenting either positive or negative correlation based on multi-modality measurements. When the LH LFP delta power fluctuation was negatively correlated to pupil size changes, the AAC (both LFP and  $\text{Ca}^{2+}$ )-pupil correlation was always negative. In contrast, varied correlation features of ACC-pupil were detected when the LH was positively correlated to pupil dynamics. Based on the LH-pupil relationship, we identified distinct cross-frequency coupling features of the LFP signals detected in the LH and ACC, defining two different anesthetized brain states (LFP-Group 1 vs. 2). In parallel, the trial-specific ACC  $\text{Ca}^{2+}$ -pupil correlation was associated with the fMRI-based LH-pupil relationship similar to the LFP results. In summary, two distinct brain states could be identified based on the LH-pupil relationship, which could be verified by analyzing the site-specific LFP cross-frequency coupling or whole-brain fMRI-based  $\text{Ca}^{2+}$  and pupil correlation patterns.

We investigated varied coupling features to evaluate different brain states in anesthetized animals. Our results showed two opposite correlation patterns between pupil dynamics and LFP measured at the LH and ACC (**Fig. 1c, d**). It is known that the neural activity in the LH plays an important role in changing and maintaining an ongoing brain state during wakefulness, sleep, and anesthesia<sup>2,20,24,33</sup>. Awake-promoting neurons in the LH (e.g. orexin-producing neurons) reduce their neural firing during both slow-wave sleep<sup>34</sup> and anesthesia<sup>20</sup>. The anesthetized brain mimics different sleep stages<sup>35</sup>, suggesting common regulatory mechanisms to control the brain state fluctuation. In addition, optogenetic activation of awake promoting neurons in the LH produces cortical arousal and behaviorally awakening from anesthesia<sup>24</sup> or sleep<sup>17</sup>. Under anesthesia, the neural firing of melanin-concentrating hormone neurons, promoting sleep<sup>19</sup>, are unaffected in spite of the reduced neural firing in awake promoting neurons<sup>20</sup>. Therefore, different neural populations in the LH may contribute to the varied coupling features of pupil dynamics at different arousal states even under anesthesia. Moreover, the LH activation causes pupil dilation<sup>21</sup> due to inhibition of Edinger Westphal Nucleus (EWN)<sup>9,36</sup>. These attributes of the LH support our observation of two opposite correlation patterns (positive and negative) between the neuronal oscillation in the LH and the pupil dynamics (**Fig. 1c, d**).

We also revealed a unique LH-ACC interaction underlying the varied brain state-dependent pupil dynamics. The ACC is an important hub of the default mode network in both humans and rats<sup>37</sup>, and its involvement in the resting-state connectivity has been observed to differ between high and low arousal states, showing a decreased participation of the ACC in the default mode network during the lower arousal state compared to higher state<sup>38,39</sup>. The neural activity in the ACC has been linked to arousal fluctuation and associated with pupil size changes, which can be explained by its bidirectional connection to the noradrenergic LC<sup>4,13,16,40</sup>. The opposite correlation features between ACC activity and pupil dynamics (**Fig. 1c, d, e, Supplementary Fig. 1**) could not be solely explained by noradrenergic projections from the LC. Given the functional and anatomical interaction between LH and ACC<sup>2,13,25,41,42</sup>, our work suggested that LH can play a pivotal role to mediate subcortical regulation of the ACC activity underlying brain state-dependent pupil dynamics. In the state when the LH delta power fluctuation was negatively correlated with pupil dynamics, the ACC LFP-pupil showed negative correlation (**Fig. 1g**). This LFP-based Group 1 state likely corresponds to a lower arousal level based on evidence from the previous electrocorticogram (ECoG) study with pupil size measurements<sup>5</sup>;

Yüzgeç et al. (2018)<sup>5</sup> demonstrated that cortical ECoG-based delta amplitude and pupil dynamics showed very low correlation during wakefulness but strong negative correlation during NREM sleep or moderate negative correlation during REM sleep. We also performed cross-frequency analyses of the LFP signals detected in the ACC and LH, which showed distinct LFP coupling features between LFP-Group 1 and 2 (**Fig. 2b**). Of note, this spectral-based differentiation of brain states is in agreement with sleep EEG studies showing that during NREM sleep, i.e., the deepest state of unconsciousness, the cortical activity peaks around 2Hz<sup>30,31,43</sup>. In contrast, during REM sleep, i.e., a state of relative awareness, the frequency peak of the EEG shifts to higher values (e.g. 2.5-3Hz in frontal-central cortical regions)<sup>31,44</sup>. Besides the frequency-specific coupling features of neural firing in the ACC and LH, the magnitude-squared coherence and phase locking analyses also showed distinct values between LFP-Group 1 and 2, which is similar to previous reports of brain state switches from conscious wakefulness to unconsciousness (e.g. anesthetized or deep sleep state)<sup>45-47</sup>. Since previous studies report that phase-amplitude coupling appears stronger in deeper anesthetized or sleep states<sup>26-28</sup>; our work strongly suggests that the trials in LFP-Group 1 are at a lower arousal level than those in LFP-Group 2.

Pupil dynamics track changes in brain states, in particular, when combined with fMRI as a non-invasive arousal indicator<sup>6,48,49</sup>. It has been shown that pupil dilation occurs concurrently with global negative BOLD-fMRI signal in anesthetized rats<sup>4</sup>, which coincides with decreased low-frequency power recorded in the cortex in both sleeping and anesthetized animals<sup>5,50</sup>. It should be noted that the correlation features between pupil dynamics and fMRI or electrophysiological signals depend on the underlying brain states<sup>4,5,49</sup>. Based on the fMRI signal detected in the LH, we have defined fMRI-Group 1 for positive correlation with pupil dynamics (33% of trials) and fMRI-Group 2 without significant correlation (~67% of trials) (**Fig. 4b**). Our results also showed brain-wide cortical negative fMRI correlation with pupil dynamics in fMRI-Group 1 but the negative correlation was not observed in fMRI-Group 2 (**Fig. 4c**). It is plausible that fMRI-Group 1 corresponds to a lower arousal state than fMRI-Group 2, similar to what has been defined by the LFP-Groups. Indeed, under this positive correlation between LH fMRI and pupil dynamics (fMRI-Group 1), we observed that Ca<sup>2+</sup>-based neuronal signals in the ACC and pupil dynamics were always negatively correlated, a result that is consistent with our electrophysiology findings (**Fig. 4d, 1g**). Furthermore, our BOLD fMRI and Ca<sup>2+</sup>-based neural



correlations were higher in fMRI-Group 1 than in fMRI-Group 2 (**Fig. 4f**), indicating a brain state change based on LH fMRI-pupil relationships.

Although fMRI-pupil interaction shows a promising indicator to estimate brain states noninvasively, more efforts remain needed to better elucidate the coupling feature of fMRI and neuronal signals during brain state fluctuation across different brain regions<sup>51-54</sup>. In the cortex, [He et al. \(2008\)](#) demonstrated varied correlation between electrophysiological and BOLD signals in awake state and slow wave sleep<sup>54</sup>. Furthermore, depending on eye open/closed arousal states in monkeys, correlation features between fMRI and LFP signals vary<sup>55</sup>, and these eye behaviors can track arousal states with fMRI<sup>6</sup>. The fiber photometry-based  $\text{Ca}^{2+}$  (GCaMP) recording with simultaneous fMRI<sup>56</sup> revealed the brain state-dependent correlation features of BOLD signal with neuronal and astrocytic  $\text{Ca}^{2+}$  signaling, relying on the neuromodulation from thalamic or brainstem nuclei<sup>4,57</sup>. In our work, ACC 1-4Hz  $\text{Ca}^{2+}$  power fluctuation was positively correlated with BOLD fMRI signals of the entire cortex (**Fig. 3f, Supplementary Fig. 6a**). In contrast, it was negatively correlated with BOLD fMRI in various subcortical regions including the LH, brainstem, and striatum (**Fig. 3f, Supplementary Fig. 6a**). Given the positive coupling feature between LH and ACC LFP data as described in LFP-Group 1, the positive correlation of LH fMRI with pupil dynamics in fMRI-Group 1 suggested negative correlation between LH fMRI and LFP. This negative correlation between BOLD fMRI and LFP low frequency power, in particular at the delta band, has been previously observed in several brain regions including subcortical areas (e.g. striatum)<sup>32,58</sup>, suggesting a non-linear relationship between the neuronal and the vascular network, which is not totally understood.

In summary, we reported varied brain state-dependent coupling features which are orchestrated in multiple regions (e.g. LH and ACC) and cross multiple scales (frequency and amplitude of neuronal firing, inter-region coherence, brain-wide fMRI, pupillary coupling, etc). This work offers a reference framework to understand the LH-ACC relationship, and, more importantly, it presents a novel way to track brain state transitions by bridging pupillary changes with the LH activity. We demonstrate that LH LFP and fMRI signals provide a strong indication of the vigilance level; hence, we anticipate that their assessment may constitute a useful approach to evaluate the ongoing brain states in arousal-related clinical research.

## Method

### Subjects

All experiments were performed in accordance with the European Communities Council Directive (2010/63EU) and the German Animal Protection Law and approved by the Animal Protection Committee of Tübingen (Regierungspräsidium Tübingen, Germany). Nine Sprague Dawley rats (Charles River Laboratories, Sulzfeld, Germany) were used for the multimodal electrophysiology experiments and nine Sprague Dawley rats for the multimodal fMRI experiments. All experiments were performed under alpha-chloralose anesthesia. The multimodal fMRI data had been previously published<sup>4</sup>.

### Surgical procedures for electrophysiology

Prior to the acquisition of the electrophysiology data, rats were anesthetized with 5% isoflurane and orally intubated with a 14-gauge cannula. They were ventilated with a mixture of 2% isoflurane, 30% oxygen, and 70% air at  $60 \pm 1$  breaths per minute by a ventilator (CW-SAR-830/AP) during surgery. The body temperature was maintained at 37-38°C by a heating pad. In order to monitor blood pressure and infuse anesthesia intravenously, cannulation of the femoral artery and vein were performed using polyethylene tubes (PE-50). Afterwards, rats were placed prone on a stereotactic device, and two craniotomies were performed using a drill over the ACC and LH. A tungsten electrode (the resistance at 1M $\Omega$ ; FHC, Inc) was placed at the ACC (M/L= +0.5mm, A/P = +1.2mm, D/V= -1.8mm) and LH (M/L= +1.5mm, A/P = -3.2mm, D/V= -7.8mm) respectively. A bolus of ~80mg/kg alpha-chloralose anesthesia was intravenously administered into the femoral vein and inhalation of isoflurane was stopped. Afterwards, a mixture of alpha-chloralose (~25mg/kg/h) and pancuronium (~2mg/kg/h), a paralytic agent, was continuously infused through an infusion pump during the whole experiment. Once the experiment was done, the location of the electrodes was confirmed by MR imaging.

### Data acquisition of electrophysiology signals

The tungsten electrodes positioned in the ACC and LH respectively were connected to our custom-made pre-amplifier (25x gain and 0.1Hz high pass), and the acquired analog signals were amplified and filtered by MCP-Plus 8 (20x gain and 10kHz low pass; Alpha Omega LTD). The total

amplification was therefore 500. A sliver wire was placed between the skull and skin above the cerebellar region as a reference. The analog signals were converted to digital signals by the CED Power1401-3A (Cambridge Electronic Design), and the digital signals were recorded by Spike2 (CED) software at 25 kHz of sampling rate. To ensure synchronization between electrophysiology and pupil size recordings, the start time to record electrophysiology signals was set to be consistent with the start time of pupil size detection by a MacroRecorder software.

### **Data acquisition of pupillometry and extraction of pupil diameter**

The pupil size was recorded by a customized video camera (dimensions: 30mm x 21mm x 15mm, focal length of the lens: 10mm) in a dark room during the experiments. Infrared LED light (880nm of wavelength) was added in order to acquire a high contrast of the pupil image. The videos were recorded with 30 frames/s, 8 bits per pixel in RGB24, and 628x586 pixels during the electrophysiology experiments and 29.97 frames/s, 8 bits per pixel in RGB24, and 240x352 pixels during the fMRI experiments. The acquired video was processed by the DeepLabCut toolbox<sup>59,60</sup> in order to extract the pupil diameter from each video frame. Four points were labeled at the edge of pupil, and the pupil diameter was calculated based on these four points with the following formula.

$$d = \frac{\sqrt{(x_2 - x_1)^2 + (y_2 - y_1)^2} + \sqrt{(x_4 - x_3)^2 + (y_4 - y_3)^2}}{2}$$

The extracted pupil diameter was first smoothed with a 10 point moving average and then down-sampled to 1 point per 1 second window for fMRI synchronization.

### **Data acquisition of MR scans**

Prior to the acquisition of MR scans, the same preparatory surgical procedures for electrophysiology such as femoral cannulation were performed. Anesthesia was also provided as described above. All MR scans were performed on a 14.1T / 26cm magnet (MagneX, Oxford) with an Avance III console (Bruker, Ettlingen), as previously described<sup>4</sup>. A custom-made elliptic trans-receiver surface coil (~2x2.7cm) was used for signal transmission and reception. For the acquisition of functional data, a 3D EPI sequence covering the whole brain was used with the following sequence parameters: 1s TR, 12.5ms TE, 48x48x32 matrix size and 400x400x600μm resolution. The total scan time was 15min 25s (925 TRs) for each EPI sequence. For the registration of MR images to a template, an

anatomical RARE image was acquired with the following parameters: 4s TR, 9ms TE, 128x128 matrix size, 32 slices, 150μm in-plane resolution, 600μm slice thickness, 8x RARE factor.

### **Data acquisition of Ca<sup>2+</sup> signals**

The GCaMP fluorescence signal was acquired from the ACC (M/L= +0.5mm, A/P = +1.2mm, D/V= - 1.8mm) via an optical fiber (FT200-EMT; NA = 0.39; 200μm diameter, Thorlabs), connected to a light path setup, as previously described<sup>4</sup>. The signals were recorded at 5kHz sampling rate using an analog input to digital converter in Biopac 150 system (Biopac, Goleta, CA, USA).

### **Analysis of electrophysiology signals**

The acquired data were processed in Matlab. In order to extract the power of LFP signals from every second, spectral analysis using wavelet decomposition was performed with 2 seconds sliding windows between 0.5 Hz and 100 Hz. The extracted LFP powers were categorized into different frequency bands based on a previous animal sleep study<sup>5</sup> as follows: delta (1-4 Hz), theta (4-7 Hz), alpha (7-14 Hz), beta (15-30 Hz), low gamma (30-60 Hz), and high gamma (60-100 Hz). The extracted power time series was first smoothed with a 11 point moving average. The correlation between the power of each frequency band and pupil diameter changes was assessed after synchronizing both signals, using the Matlab corrcoef function.

### Coherence

Coherence analysis is a standard method to evaluate functional connection of different brain regions in the frequency domain in electrophysiology studies<sup>61</sup>. Prior to evaluating the coherence, the raw data was downsampled from 25000 to 500 sampling points per second. In the coherence analysis between the ACC and LH electrophysiology recordings sites, the Matlab mscohere function was used to calculate the magnitude-squared coherence with a 2 s Hanning window and an overlap of 1s. This function has been used to compute functional connectivity measures in electrophysiology studies<sup>62</sup>.

### Phase locking value analysis

The phase locking value (PLV) measures synchronization of the phase between two different brain regions to investigate functional connectivity<sup>63</sup>. Prior to calculating the PLV, the raw data was

downsampled from 25000 to 5000 sampling points per second. The phase of each LFP was extracted using the Morlet wavelet and the fast Fourier transform from LH and ACC LFP signals respectively. Then, the PLV was calculated with the following formula:

$$PLV = \left| \frac{\sum_{t=1}^n e^{i(\phi_{LH(t)} - \phi_{ACC(t)})}}{n} \right|$$

where  $n$  represents the number of sampling points,  $\phi$  represents phase angles with the same length of sampling points, and  $e^i$  represents the exponential integral.

### Phase-amplitude coupling

The phase amplitude coupling, using the modulation index (MI), is a well-used method to evaluate modulation of brain functions; it estimates how the phase of the low frequency oscillation (e.g. delta band) couples with the amplitude of the high frequency oscillation (e.g. gamma band)<sup>27,64</sup>. Prior to calculating the MI, the amplitude of the upper envelope of the LFP signal in each frequency band was extracted using the Matlab envelope function, and the phase angles of each frequency band were extracted using the Matlab hilbert and angle functions. Then, the MI was calculated using the Kullback–Leibler (KL) distance between the amplitude and phase distributions as described in Tort et al. (2010)<sup>64</sup> using the ‘modulation\_index’ Matlab function ([https://github.com/pierremegevand/modulation\\_index](https://github.com/pierremegevand/modulation_index)).

### **Analysis of fMRI signals**

The EPI data from each animal were registered to an anatomical scan (RARE) of the corresponding animal. To spatially match data across animals, one RARE scan was used as a template and other anatomical scans were registered to it, while saving the transformation matrices. Finally, the saved transformation matrices were used to register all functional data together. A bandpass filter was applied to the fMRI signals between 0.01 and 0.1Hz. These fMRI signals were correlated with pupil diameter changes and the power of 1-4Hz  $Ca^{2+}$  signals using the Matlab corr function. With the purpose of comparing the whole brain fMRI map with previous publications<sup>4,48</sup>, the voxel-wise correlation t-value was calculated based on the following formula:

$$t = \frac{r\sqrt{n-2}}{\sqrt{1-r^2}}$$

where  $r$  represents the correlation coefficient and  $n$  represents the number of sampling points from each run. Once the whole brain t-value map was generated, it was registered on the anatomical image using the AFNI software package<sup>65</sup>. In addition, these anatomical scans were overlapped with a rat brain atlas<sup>66</sup> to identify the location of brain regions.

## Analysis of Ca<sup>2+</sup> signals

The acquired optical fiber Ca<sup>2+</sup> signals (GCaMP) were processed by Matlab. The Ca<sup>2+</sup> signal was first synchronized with fMRI signals with a customized Matlab code. In order to extract the power of Ca<sup>2+</sup> signals, spectral analysis using wavelet decomposition was performed with 2 seconds sliding windows between 0.5 Hz and 100 Hz every second. Then, 1-4 Hz of Ca<sup>2+</sup> powers, equivalent to the delta band of LFP, were extracted. The power of 1-4Hz Ca<sup>2+</sup> signals was correlated with pupil diameter changes and fMRI signals using the Matlab corrcoef function.

## Analysis to determine the thresholds for the positive, no, and negative correlation

**ACC and LH electrophysiology vs. pupil:** The thresholds for positive and negative correlations were statistically determined by taking the 95% confidence interval from correlations between randomized pupil signals and LFP delta power with 10,000 times of permutation using the Matlab randperm and corrcoef functions (**Supplementary Fig. 2**). Trials above the upper confidence limit (correlation coefficients > 0.065) were defined as positive correlations and those below the lower confidence limit (correlation coefficients < -0.065) as negative correlations. Trials remaining within this 95% confidence interval were considered as uncorrelated. Using the randomized pupil signal, distribution of correlation coefficients with LFP delta power across all trials was examined to assess whether this distribution of correlations with randomized data deviates from the true data. The result shows that distributions between the true and randomized results differ (**Fig. 1e, Supplementary Fig. 2**), indicating that correlation between pupil and LFP signals are not random.

**Pupil vs. ACC Ca<sup>2+</sup>:** The thresholds for positive and negative correlations were statistically determined by taking the 95% confidence interval from correlations between randomized pupil signals and 1-4Hz Ca<sup>2+</sup> power with 10,000 times of permutation using the Matlab randperm and corrcoef functions (**Supplementary Fig. 5**). Trials above the upper confidence limit (0.065) were defined as positive correlations and below the lower confidence limit (-0.065) were defined as

negative correlations. Otherwise, trials within this 95% confidence interval were considered as no correlation. Using the randomized pupil signal, distribution of correlation coefficients with 1-4Hz  $\text{Ca}^{2+}$  power across all trials was examined to see if this distribution of correlations with randomized data deviates from the true data. The result shows that distributions between the true and randomized results differ (**Fig. 3d, Supplementary Fig. 5**), indicating that correlation between pupil and  $\text{Ca}^{2+}$  signals are not random.

**fMRI vs. pupil:** The two different brain states (positive or no correlation between BOLD fMRI and pupil dynamics) were statistically determined by taking the 95% confidence interval from correlations between the randomized pupil signal and fMRI signal in the LH with 10,000 times of permutation using the Matlab randperm and corr functions. The result shows that the distribution of correlations with randomized data differs from the true data (**Supplementary Fig. 8**), indicating that correlations between pupil and fMRI signals are not random. Trials above the upper confidence limit (1.96) were defined as positive correlations and those between the upper and lower confidence limit ( $-1.96 < \text{CI} < 1.96$ ) were defined as no correlation. The LH region of interest was located in a single slice centered at the same position as electrophysiology LH recordings (33 manually selected voxels at  $\text{A/P} = -3.2\text{mm}$ ). T-values for correlation were calculated for the whole brain analysis as described above. In addition, the correlation between pupil and each fMRI voxel was corrected by the false discovery rate using the 'FDR' Matlab function with alpha 0.05 for 20022 voxels (<https://www.mathworks.com/matlabcentral/fileexchange/71734-fdr-false-discovery-rate>). Thereby, the whole-brain maps show voxels of positive correlation with t-value  $> 2.54$  and negative correlation with t-value  $< -2.54$  (**Fig. 4c, Supplementary Fig. 7**).

**fMRI vs. ACC  $\text{Ca}^{2+}$ :** T-values for correlation were calculated between the power of 1-4Hz ACC  $\text{Ca}^{2+}$  and each fMRI voxel as described above. In addition, the correlation was corrected by the false discovery rate using the 'FDR' Matlab function with alpha 0.05 for 20022 voxels as described above. Thereby, the whole-brain maps show voxels of positive correlation with t-value  $> 2.25$  and negative correlation with t-value  $< -2.25$  (**Fig. 3f, 4f, Supplementary Fig. 6a, 6b**).

## Tables

Table 1. Mean and standard deviation of phase locking value in LFP-Group 1 and 2.

|                                 | Mean        |             | SD          |             |
|---------------------------------|-------------|-------------|-------------|-------------|
|                                 | LFP-Group 1 | LFP-Group 2 | LFP-Group 1 | LFP-Group 2 |
| Phase locking value (ACC vs LH) |             |             |             |             |
| 1 Hz                            | 0.3388      | 0.3027      | 0.1536      | 0.1291      |
| 2 Hz                            | 0.6596      | 0.4279      | 0.1723      | 0.2136      |
| 3 Hz                            | 0.5426      | 0.7119      | 0.1393      | 0.1535      |
| 4 Hz                            | 0.3724      | 0.5322      | 0.1622      | 0.1267      |
| 5 Hz                            | 0.2799      | 0.3257      | 0.0977      | 0.1097      |

Table 2. Mean and standard deviation of modulation index in LFP-Group 1 and 2.

|                                      | Mean        |             | SD          |             |
|--------------------------------------|-------------|-------------|-------------|-------------|
|                                      | LFP-Group 1 | LFP-Group 2 | LFP-Group 1 | LFP-Group 2 |
| Modulation index                     |             |             |             |             |
| Delta phase vs. theta amplitude      | 0.0114      | 0.0035      | 0.0061      | 0.0020      |
| Delta phase vs. alpha amplitude      | 0.0590      | 0.0252      | 0.0255      | 0.0122      |
| Delta phase vs. beta amplitude       | 0.1196      | 0.0578      | 0.0463      | 0.0263      |
| Delta phase vs. low gamma amplitude  | 0.0691      | 0.0376      | 0.0364      | 0.0269      |
| Delta phase vs. high gamma amplitude | 0.1081      | 0.0608      | 0.0439      | 0.0293      |



## **Author contributions**

Research design: X.Y., K.T., Data acquisition: K.T., P.P.-R., Data analysis: K.T., Technical support: F.S., Writing – original draft: K.T., Writing – review & editing: X.Y., K.T., P.P.-R., F.S., Supervision: X.Y.

## **Acknowledgments**

We thank Dr. R. Pohmann, Dr. K. Buckenmaier, Ms. H. Schulz, and Dr. J. Engelmann for technical support, Dr. E. Weiler, Dr. P. Douay, and Ms. R. König for animal protocol and maintenance support, and Mr. M. Arndt and Mr. O. Holder for electrical support.

## **Funding**

This research was supported by internal funding from Max Planck Society, NIH Brain Initiative funding (RF1NS113278, 1R01NS122904, R01MH111438), NSF grant (2123971) and shared instrument grant (S10 MH124733-01), German Research Foundation (DFG) YU215/2-1 and Yu215/3–1, BMBF 01GQ1702.

# References

- 1 Brown, E. N., Lydic, R. & Schiff, N. D. General anesthesia, sleep, and coma. *N Engl J Med* **363**, 2638-2650, doi:10.1056/NEJMra0808281 (2010).
- 2 Saper, C. B., Chou, T. C. & Scammell, T. E. The sleep switch: hypothalamic control of sleep and wakefulness. *Trends Neurosci* **24**, 726-731, doi:10.1016/s0166-2236(00)02002-6 (2001).
- 3 McGinley, M. J., David, S. V. & McCormick, D. A. Cortical Membrane Potential Signature of Optimal States for Sensory Signal Detection. *Neuron* **87**, 179-192, doi:10.1016/j.neuron.2015.05.038 (2015).
- 4 Pais-Roldan, P. *et al.* Indexing brain state-dependent pupil dynamics with simultaneous fMRI and optical fiber calcium recording. *P Natl Acad Sci USA* **117**, 6875-6882, doi:10.1073/pnas.1909937117 (2020).
- 5 Yuzgec, O., Prsa, M., Zimmermann, R. & Huber, D. Pupil Size Coupling to Cortical States Protects the Stability of Deep Sleep via Parasympathetic Modulation. *Curr Biol* **28**, 392-400 e393, doi:10.1016/j.cub.2017.12.049 (2018).
- 6 Chang, C. *et al.* Tracking brain arousal fluctuations with fMRI. *Proc Natl Acad Sci U S A* **113**, 4518-4523, doi:10.1073/pnas.1520613113 (2016).
- 7 Carter, M. E. *et al.* Tuning arousal with optogenetic modulation of locus coeruleus neurons. *Nat Neurosci* **13**, 1526-1533, doi:10.1038/nn.2682 (2010).
- 8 Liu, Y., Rodenkirch, C., Moskowitz, N., Schriver, B. & Wang, Q. Dynamic Lateralization of Pupil Dilation Evoked by Locus Coeruleus Activation Results from Sympathetic, Not Parasympathetic, Contributions. *Cell Rep* **20**, 3099-3112, doi:10.1016/j.celrep.2017.08.094 (2017).
- 9 Szabadi, E. Functional Organization of the Sympathetic Pathways Controlling the Pupil: Light-Inhibited and Light-Stimulated Pathways. *Front Neurol* **9**, 1069, doi:10.3389/fneur.2018.01069 (2018).
- 10 Weber, F. *et al.* Control of REM sleep by ventral medulla GABAergic neurons. *Nature* **526**, 435-438, doi:10.1038/nature14979 (2015).
- 11 Reimer, J. *et al.* Pupil fluctuations track rapid changes in adrenergic and cholinergic activity in cortex. *Nat Commun* **7**, 13289, doi:10.1038/ncomms13289 (2016).
- 12 Costa, V. D. & Rudebeck, P. H. More than Meets the Eye: the Relationship between Pupil Size and Locus Coeruleus Activity. *Neuron* **89**, 8-10, doi:10.1016/j.neuron.2015.12.031 (2016).
- 13 Gompf, H. S. *et al.* Locus ceruleus and anterior cingulate cortex sustain wakefulness in a novel environment. *J Neurosci* **30**, 14543-14551, doi:10.1523/JNEUROSCI.3037-10.2010 (2010).
- 14 Rudebeck, P. H. *et al.* A role for primate subgenual cingulate cortex in sustaining autonomic arousal. *P Natl Acad Sci USA* **111**, 5391-5396, doi:10.1073/pnas.1317695111 (2014).
- 15 DiNuzzo, M. *et al.* Brain Networks Underlying Eye's Pupil Dynamics. *Front Neurosci-Switz* **13**, doi:ARTN 96510.3389/fnins.2019.00965 (2019).
- 16 Joshi, S., Li, Y., Kalwani, R. M. & Gold, J. I. Relationships between Pupil Diameter and Neuronal Activity in the Locus Coeruleus, Colliculi, and Cingulate Cortex. *Neuron* **89**, 221-234, doi:10.1016/j.neuron.2015.11.028 (2016).
- 17 Adamantidis, A. R., Zhang, F., Aravanis, A. M., Deisseroth, K. & de Lecea, L. Neural substrates of awakening probed with optogenetic control of hypocretin neurons. *Nature* **450**, 420-424, doi:10.1038/nature06310 (2007).
- 18 Hassani, O. K., Lee, M. G. & Jones, B. E. Melanin-concentrating hormone neurons discharge in a reciprocal manner to orexin neurons across the sleep-wake cycle. *Proc Natl Acad Sci U S A* **106**, 2418-2422, doi:10.1073/pnas.0811400106 (2009).
- 19 Konadhode, R. R. *et al.* Optogenetic stimulation of MCH neurons increases sleep. *J Neurosci* **33**, 10257-10263, doi:10.1523/JNEUROSCI.1225-13.2013 (2013).
- 20 Kelz, M. B. *et al.* An essential role for orexins in emergence from general anesthesia. *Proc Natl Acad Sci U S A* **105**, 1309-1314, doi:10.1073/pnas.0707146105 (2008).
- 21 RANSON, S. W. & MAGOUN, H. W. RESPIRATORY AND PUPILLARY REACTIONS: INDUCED BY ELECTRICAL STIMULATION OF THE HYPOTHALAMUS. *Archives of Neurology & Psychiatry* **29**, 1179-1194, doi:10.1001/archneurpsyc.1933.02240120002001 %J Archives of Neurology & Psychiatry (1933).

- 22 Hagan, J. J. *et al.* Orexin A activates locus coeruleus cell firing and increases arousal in the rat. *Proc Natl Acad Sci U S A* **96**, 10911-10916, doi:10.1073/pnas.96.19.10911 (1999).
- 23 de Lecea, L. Optogenetic control of hypocretin (orexin) neurons and arousal circuits. *Curr Top Behav Neurosci* **25**, 367-378, doi:10.1007/7854\_2014\_364 (2015).
- 24 Herrera, C. G. *et al.* Hypothalamic feedforward inhibition of thalamocortical network controls arousal and consciousness. *Nat Neurosci* **19**, 290-298, doi:10.1038/nn.4209 (2016).
- 25 Jin, J. *et al.* Orexin neurons in the lateral hypothalamus project to the medial prefrontal cortex with a rostro-caudal gradient. *Neurosci Lett* **621**, 9-14, doi:10.1016/j.neulet.2016.04.002 (2016).
- 26 Pal, D. *et al.* Propofol, Sevoflurane, and Ketamine Induce a Reversible Increase in Delta-Gamma and Theta-Gamma Phase-Amplitude Coupling in Frontal Cortex of Rat. *Front Syst Neurosci* **11**, 41, doi:10.3389/fnsys.2017.00041 (2017).
- 27 Mukamel, E. A., Wong, K. F., Prerau, M. J., Brown, E. N. & Purdon, P. L. Phase-based measures of cross-frequency coupling in brain electrical dynamics under general anesthesia. *Annu Int Conf IEEE Eng Med Biol Soc* **2011**, 1981-1984, doi:10.1109/IEMBS.2011.6090558 (2011).
- 28 Nair, J. *et al.* Gamma band directional interactions between basal forebrain and visual cortex during wake and sleep states. *J Physiol-Paris* **110**, 19-28, doi:10.1016/j.jphysparis.2016.11.011 (2016).
- 29 Marsaglia, G., Tsang, W. W. & Wang, J. Evaluating Kolmogorov's Distribution. *2003* **8**, 4 %J Journal of Statistical Software, doi:10.18637/jss.v008.i18 (2003).
- 30 Benoit, O., Daurat, A. & Prado, J. Slow (0.7-2 Hz) and fast (2-4 Hz) delta components are differently correlated to theta, alpha and beta frequency bands during NREM sleep. *Clin Neurophysiol* **111**, 2103-2106, doi:10.1016/s1388-2457(00)00470-3 (2000).
- 31 Olbrich, E., Rusterholz, T., LeBourgeois, M. K. & Achermann, P. Developmental Changes in Sleep Oscillations during Early Childhood. *Neural Plast* **2017**, 6160959, doi:10.1155/2017/6160959 (2017).
- 32 Jaime, S. *et al.* Delta Rhythm Orchestrates the Neural Activity Underlying the Resting State BOLD Signal via Phase-amplitude Coupling. *Cereb Cortex* **29**, 119-133, doi:10.1093/cercor/bhx310 (2019).
- 33 Yin, L. *et al.* Optogenetic/Chemogenetic Activation of GABAergic Neurons in the Ventral Tegmental Area Facilitates General Anesthesia via Projections to the Lateral Hypothalamus in Mice. *Front Neural Circuits* **13**, 73, doi:10.3389/fncir.2019.00073 (2019).
- 34 Lee, M. G., Hassani, O. K. & Jones, B. E. Discharge of identified orexin/hypocretin neurons across the sleep-waking cycle. *J Neurosci* **25**, 6716-6720, doi:10.1523/JNEUROSCI.1887-05.2005 (2005).
- 35 Vacas, S., Kurien, P. & Maze, M. Sleep and Anesthesia - Common mechanisms of action. *Sleep Med Clin* **8**, 1-9, doi:10.1016/j.jsmc.2012.11.009 (2013).
- 36 Koss, M. C., Gherezghiher, T. & Nomura, A. CNS adrenergic inhibition of parasympathetic oculomotor tone. *J Auton Nerv Syst* **10**, 55-68, doi:10.1016/0165-1838(84)90067-5 (1984).
- 37 Lu, H. B. *et al.* Rat brains also have a default mode network. *P Natl Acad Sci USA* **109**, 3979-3984, doi:10.1073/pnas.1200506109 (2012).
- 38 Horowitz, S. G. *et al.* Decoupling of the brain's default mode network during deep sleep. *P Natl Acad Sci USA* **106**, 11376-11381, doi:10.1073/pnas.0901435106 (2009).
- 39 Tarun, A. *et al.* NREM sleep stages specifically alter dynamical integration of large-scale brain networks. *iScience* **24**, 101923, doi:10.1016/j.isci.2020.101923 (2021).
- 40 Ebitz, R. B. & Platt, M. L. Neuronal activity in primate dorsal anterior cingulate cortex signals task conflict and predicts adjustments in pupil-linked arousal. *Neuron* **85**, 628-640, doi:10.1016/j.neuron.2014.12.053 (2015).
- 41 Stevens, F. L., Hurley, R. A. & Taber, K. H. Anterior cingulate cortex: unique role in cognition and emotion. *J Neuropsychiatry Clin Neurosci* **23**, 121-125, doi:10.1176/appi.neuropsych.23.2.12110.1176/jnp.23.2.jnp121 (2011).
- 42 Morgane, P. J., Galler, J. R. & Mokler, D. J. A review of systems and networks of the limbic forebrain/limbic midbrain. *Prog Neurobiol* **75**, 143-160, doi:10.1016/j.pneurobio.2005.01.001 (2005).
- 43 Rodenbeck, A. *et al.* A review of sleep EEG patterns. Part I: A compilation of amended rules for their visual recognition according to Rechtschaffen and Kales. *Somnologie* -

*Schlafforschung und Schlafmedizin* **10**, 159-175, doi:10.1111/j.1439-054X.2006.00100.x (2006).

- 44 Bernardi, G. *et al.* Regional Delta Waves In Human Rapid Eye Movement Sleep. *J Neurosci* **39**, 2686-2697, doi:10.1523/JNEUROSCI.2298-18.2019 (2019).
- 45 Ishizawa, Y. *et al.* Dynamics of Propofol-Induced Loss of Consciousness Across Primate Neocortex. *J Neurosci* **36**, 7718-7726, doi:10.1523/JNEUROSCI.4577-15.2016 (2016).
- 46 Migliorelli, C. *et al.* Alterations in EEG connectivity in healthy young adults provide an indicator of sleep depth. *Sleep* **42**, doi:ARTN zsz08110.1093/sleep/zsz081 (2019).
- 47 Miyamoto, D. *et al.* Top-down cortical input during NREM sleep consolidates perceptual memory. *Science* **352**, 1315-1318, doi:10.1126/science.aaf0902 (2016).
- 48 Schneider, M. *et al.* Spontaneous pupil dilations during the resting state are associated with activation of the salience network. *Neuroimage* **139**, 189-201, doi:10.1016/j.neuroimage.2016.06.011 (2016).
- 49 Yellin, D., Berkovich-Ohana, A. & Malach, R. Coupling between pupil fluctuations and resting-state fMRI uncovers a slow build-up of antagonistic responses in the human cortex. *Neuroimage* **106**, 414-427, doi:10.1016/j.neuroimage.2014.11.034 (2015).
- 50 Blasiak, T., Zawadzki, A. & Lewandowski, M. H. Infra-slow oscillation (ISO) of the pupil size of urethane-anaesthetised rats. *PloS one* **8**, e62430, doi:10.1371/journal.pone.0062430 (2013).
- 51 Magri, C., Schridde, U., Murayama, Y., Panzeri, S. & Logothetis, N. K. The amplitude and timing of the BOLD signal reflects the relationship between local field potential power at different frequencies. *J Neurosci* **32**, 1395-1407, doi:10.1523/JNEUROSCI.3985-11.2012 (2012).
- 52 Mukamel, R. *et al.* Coupling between neuronal firing, field potentials, and fMRI in human auditory cortex. *Science* **309**, 951-954, doi:10.1126/science.1110913 (2005).
- 53 Conner, C. R., Ellmore, T. M., Pieters, T. A., DiSano, M. A. & Tandon, N. Variability of the Relationship between Electrophysiology and BOLD-fMRI across Cortical Regions in Humans. *Journal of Neuroscience* **31**, 12855-12865, doi:10.1523/Jneurosci.1457-11.2011 (2011).
- 54 He, B. J., Snyder, A. Z., Zempel, J. M., Smyth, M. D. & Raichle, M. E. Electrophysiological correlates of the brain's intrinsic large-scale functional architecture. *Proc Natl Acad Sci U S A* **105**, 16039-16044, doi:10.1073/pnas.0807010105 (2008).
- 55 Scholvinck, M. L., Maier, A., Ye, F. Q., Duyn, J. H. & Leopold, D. A. Neural basis of global resting-state fMRI activity. *Proc Natl Acad Sci U S A* **107**, 10238-10243, doi:10.1073/pnas.0913110107 (2010).
- 56 He, Y. *et al.* Ultra-Slow Single-Vessel BOLD and CBV-Based fMRI Spatiotemporal Dynamics and Their Correlation with Neuronal Intracellular Calcium Signals. *Neuron* **97**, 925-939 e925, doi:10.1016/j.neuron.2018.01.025 (2018).
- 57 Wang, M. S., He, Y., Sejnowski, T. J. & Yu, X. Brain-state dependent astrocytic Ca<sup>2+</sup> signals are coupled to both positive and negative BOLD-fMRI signals. *P Natl Acad Sci USA* **115**, E1647-E1656, doi:10.1073/pnas.1711692115 (2018).
- 58 Hutchison, R. M., Hashemi, N., Gati, J. S., Menon, R. S. & Everling, S. Electrophysiological signatures of spontaneous BOLD fluctuations in macaque prefrontal cortex. *Neuroimage* **113**, 257-267, doi:10.1016/j.neuroimage.2015.03.062 (2015).
- 59 Mathis, A. *et al.* DeepLabCut: markerless pose estimation of user-defined body parts with deep learning. *Nat Neurosci* **21**, 1281-1289, doi:10.1038/s41593-018-0209-y (2018).
- 60 Nath, T. *et al.* Using DeepLabCut for 3D markerless pose estimation across species and behaviors. *Nat Protoc* **14**, 2152-2176, doi:10.1038/s41596-019-0176-0 (2019).
- 61 Nunez, P. L. *et al.* EEG coherency. I: Statistics, reference electrode, volume conduction, Laplacians, cortical imaging, and interpretation at multiple scales. *Electroencephalogr Clin Neurophysiol* **103**, 499-515, doi:10.1016/s0013-4694(97)00066-7 (1997).
- 62 Chapeton, J. I., Haque, R., Wittig, J. H., Inati, S. K. & Zaghloul, K. A. Large-Scale Communication in the Human Brain Is Rhythmically Modulated through Alpha Coherence. *Current Biology* **29**, 2801-+, doi:10.1016/j.cub.2019.07.014 (2019).
- 63 Lachaux, J. P., Rodriguez, E., Martinerie, J. & Varela, F. J. Measuring phase synchrony in brain signals. *Hum Brain Mapp* **8**, 194-208, doi:10.1002/(sici)1097-0193(1999)8:4<194::aid-hbm4>3.0.co;2-c (1999).

- 64 Tort, A. B. L., Komorowski, R., Eichenbaum, H. & Kopell, N. Measuring Phase-Amplitude Coupling Between Neuronal Oscillations of Different Frequencies. *J Neurophysiol* **104**, 1195-1210, doi:10.1152/jn.00106.2010 (2010).
- 65 Cox, R. W. AFNI: software for analysis and visualization of functional magnetic resonance neuroimages. *Comput Biomed Res* **29**, 162-173, doi:10.1006/cbmr.1996.0014 (1996).
- 66 Paxinos, G. & Watson, C. *The rat brain in stereotaxic coordinates*. 6th edn, (Academic Press/Elsevier, 2007).

## **Supplementary information**

### **Characterizing pupil dynamics coupling to brain state fluctuation based on lateral hypothalamic activity**

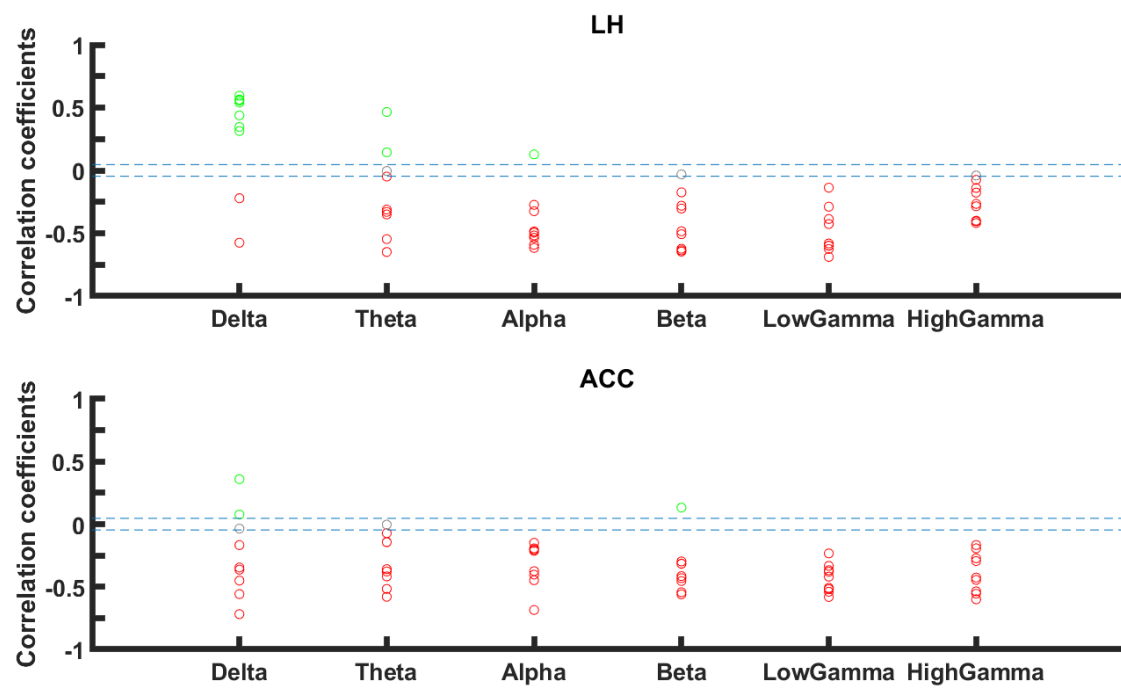

**Supplementary Figure 1.** Correlation coefficients between pupil dynamics and power of all LFP bands in LH (top) and ACC (bottom) from a single representative animal. Each marker represents positive (green), no (gray), or negative (red) correlation from every single trial. Thresholds of positive (0.046) or negative (-0.046) correlation are shown as blue dashed lines.



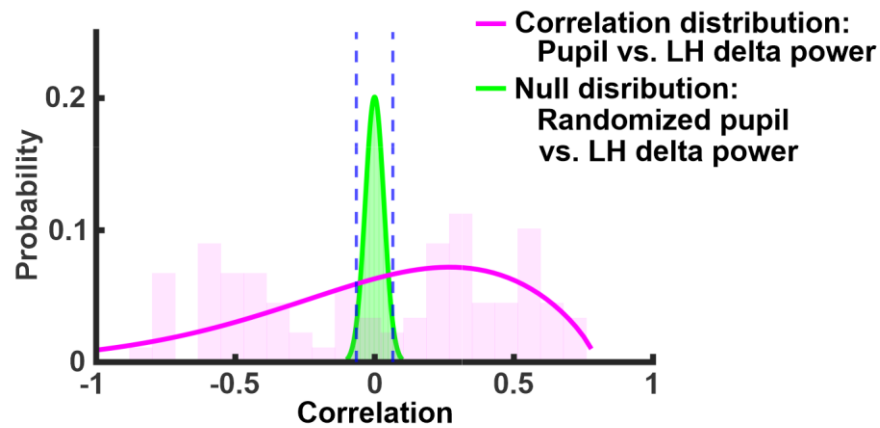

**Supplementary Figure 2.** Determination of the threshold for positive and negative correlations between electrophysiology signals and pupil fluctuation. The pupil signals were first randomized using randperm function in Matlab. Using these randomized pupil signals together with 1-4Hz LFP power, the correlation coefficient was calculated, and the permutation was conducted with 10,000 times of repetition across 61 trials. The 95% confidence interval of correlation coefficients from this permutation test was between -0.046 and 0.046, indicated with dashed blue lines. The distribution of correlation coefficients between randomized pupil and LH delta power is in green and the distribution of correlation coefficients between pupil and LH delta power is in pink (same as Fig.1e left).



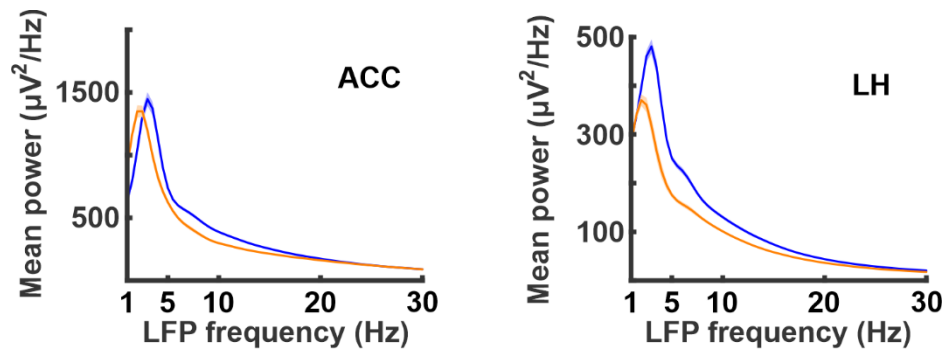

**Supplementary Figure 3.** Power spectral density of the ACC (**left**) and LH (**right**) between 1Hz and 30Hz range in [+] pupilxLH LFP( $\delta$ ) cases (blue line) and [-] pupilxLH LFP( $\delta$ ) cases (orange line). Standard errors are represented with a shading area. The peak frequency in both LH and ACC is at 3Hz in LFP-Group 2 (blue; [+] pupilxLH LFP( $\delta$ ) cases) but at 2Hz in LFP-Group 1 (orange; [-] pupilxLH LFP( $\delta$ ) cases).

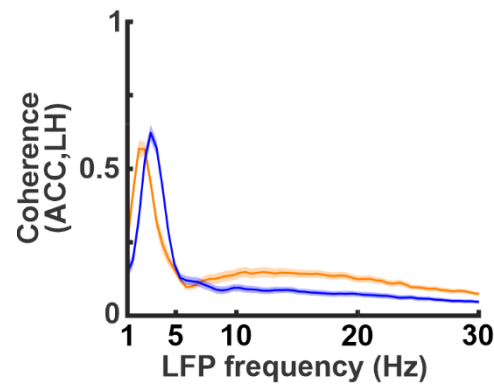

**Supplementary Figure 4.** Magnitude squared coherence (MSC) between the LH and ACC in 1Hz to 30Hz range. The highest coherence occurred at 3Hz in LFP-Group 2 (blue; [+] pupil $\times$ LH LFP( $\delta$ ) cases) but at 2Hz in LFP-Group 1 (orange; [-] pupil $\times$ LH LFP( $\delta$ ) cases).

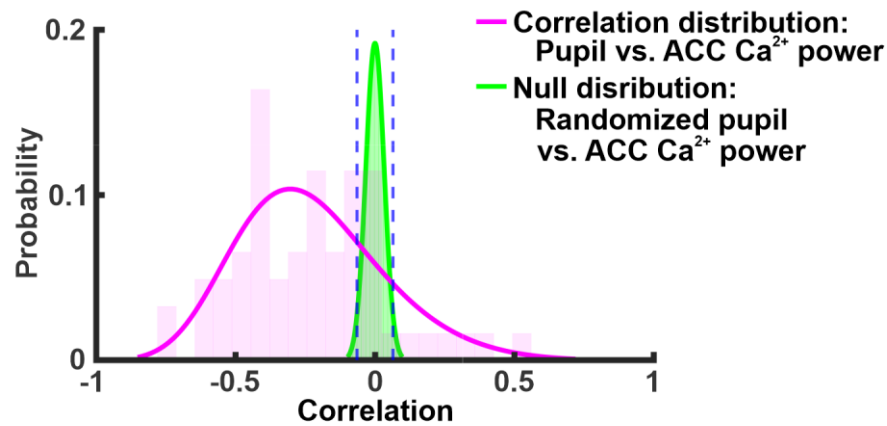

**Supplementary Figure 5.** Determination of the threshold for positive and negative correlations between Ca<sup>2+</sup> signals and pupil fluctuation. The correlation coefficient was calculated between randomized pupil signals and 1-4Hz Ca<sup>2+</sup> power, and then permutation was conducted with 10,000 times of repetition across 61 trials. The 95% confidence interval of correlation coefficients from this permutation test was between -0.064 and 0.064, indicated with dashed blue lines. The distribution of correlation coefficients between randomized pupil and ACC 1-4Hz Ca<sup>2+</sup> power is in green and the distribution of correlation coefficients between pupil and ACC 1-4Hz Ca<sup>2+</sup> power is in pink (same as Fig.3d).

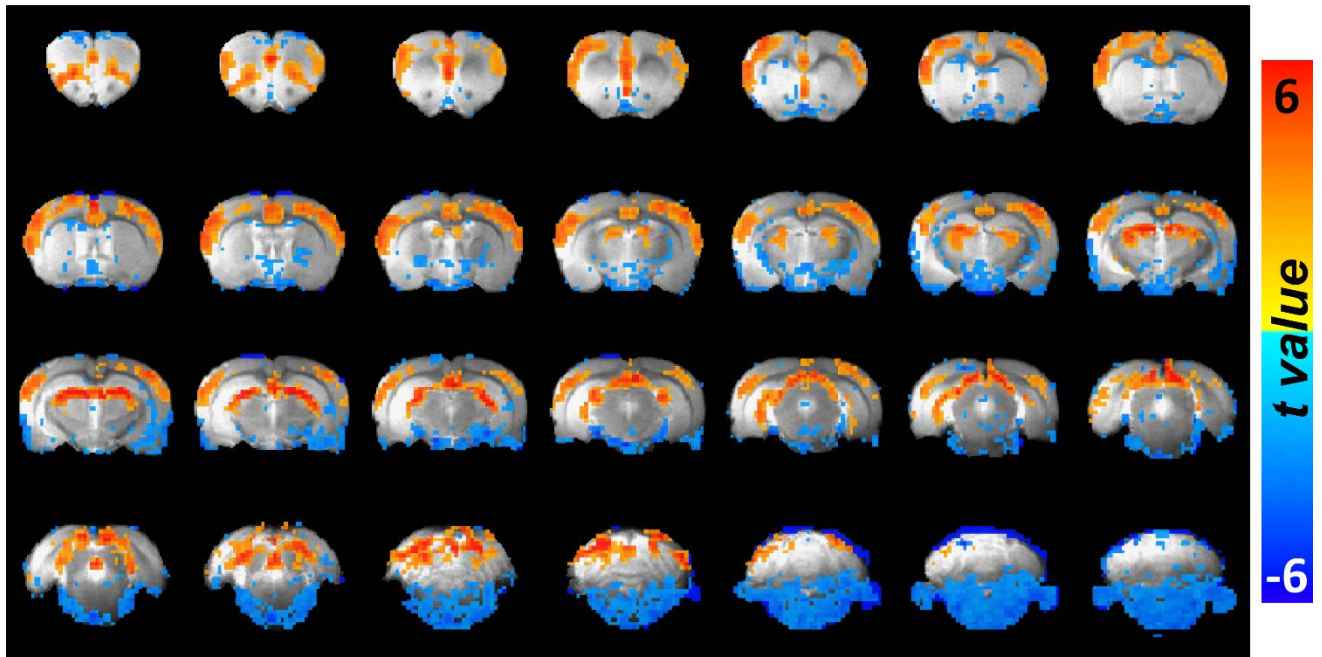

**Supplementary Figure 6. a)** Averaged correlation maps between ACC 1-4Hz  $\text{Ca}^{2+}$  power and each voxel of fMRI signals from all trials ( $n=61$ ). The overlay shows voxels with  $t$ -value  $< -2.25$  and  $t$ -value  $> 2.25$ .

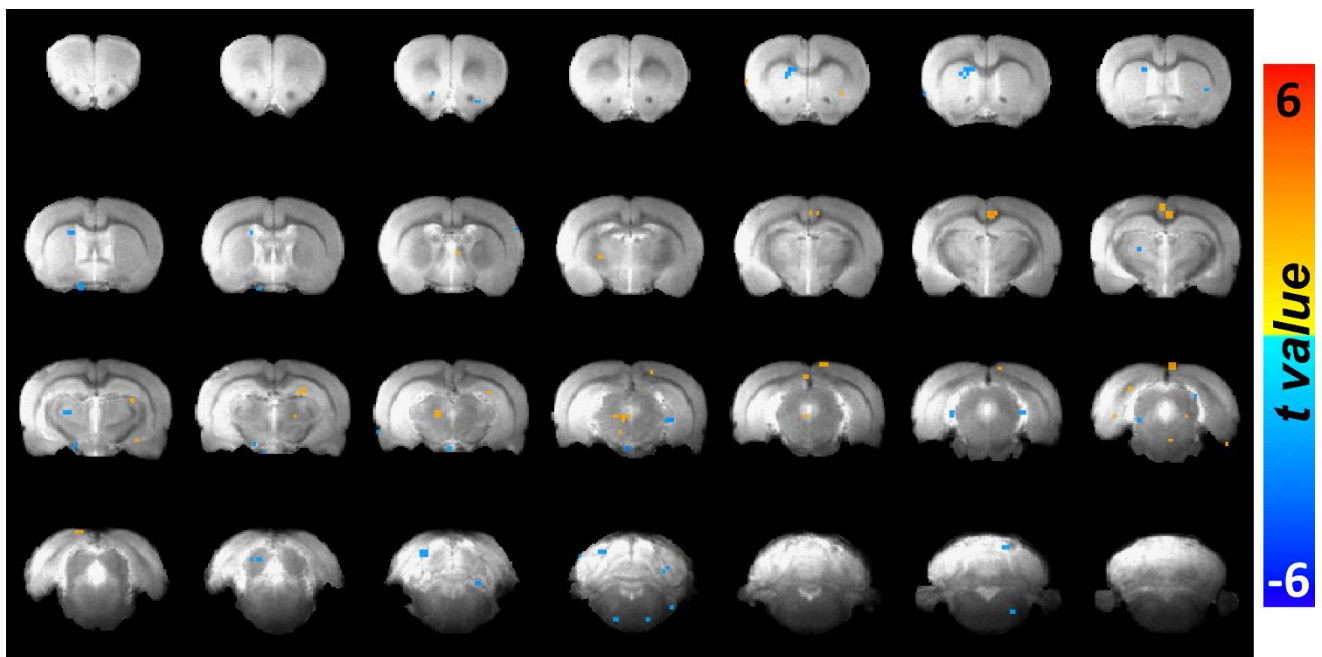

**Supplementary Figure 6. b)** Averaged correlation maps between ACC 1-4Hz  $\text{Ca}^{2+}$  power and each voxel of fMRI signals when ACC 1-4Hz  $\text{Ca}^{2+}$  power and pupil dynamics are not negatively correlated ( $n=19$ ). The overlay shows voxels with  $t$ -value  $< -2.25$  and  $t$ -value  $> 2.25$ .

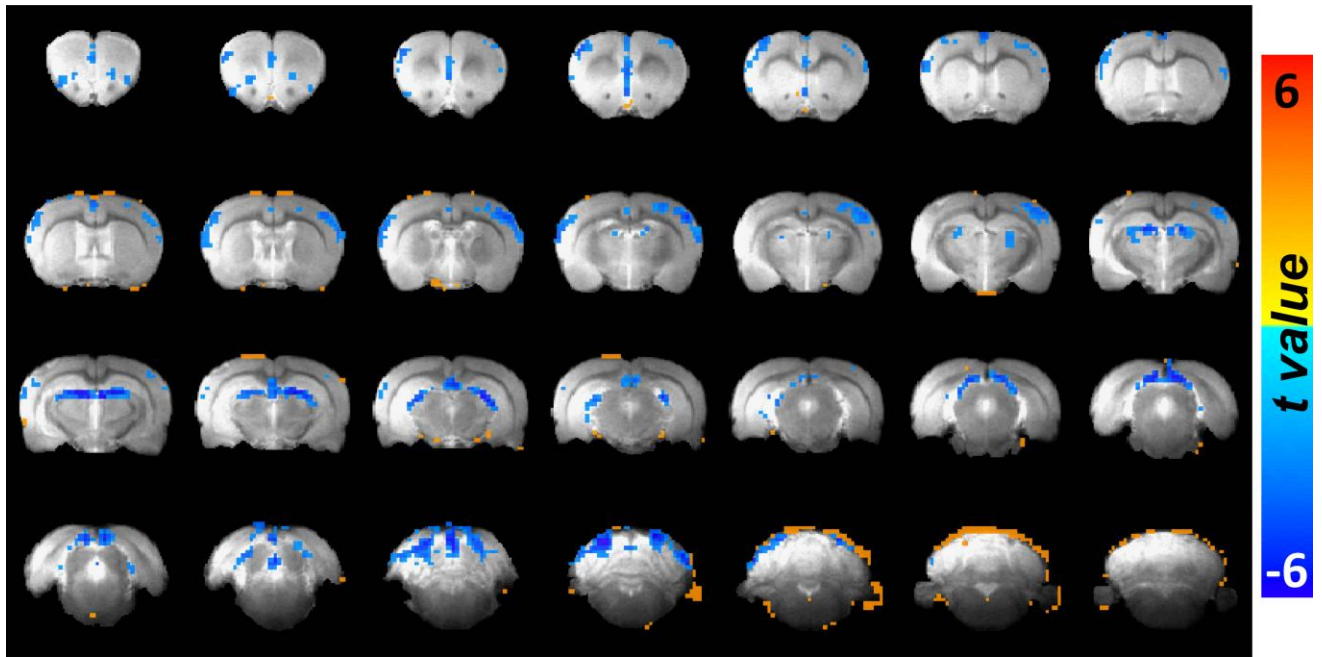

**Supplementary Figure 7.** Correlation maps between each fMRI voxel and pupil dynamics from all trials ( $n=61$ ). The overlay shows voxels with  $t$ -value  $< -2.54$  and  $t$ -value  $> 2.54$ .

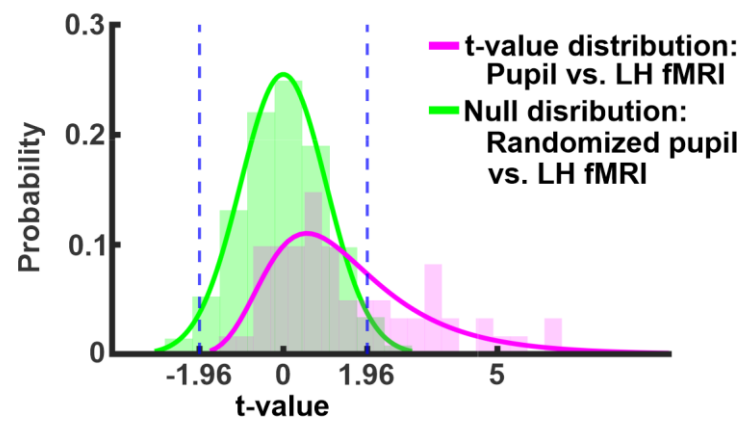

**Supplementary Figure 8.** Determination of the threshold for positive and negative correlation between LH fMRI signals and pupil fluctuation. The pupil signals were first randomized, and t-values between this randomized pupil signal and all LH fMRI voxels (AP= -3.2mm) were calculated. Then, permutation was conducted with 10,000 repetitions across 61 trials. The 95% confidence interval of t-values from this permutation test was between -1.96 and 1.96 (indicated with dashed blue line). The distribution of t-values between randomized pupil and LH fMRI is in green and the distribution between pupil and LH fMRI is in pink (same as Fig.4b).
